# Supplementary material for: Reaction of an N/Al FLP-based aluminum hydride toward alkynes: deprotonated aluminationversushydroalumination with regioselectivecis-addition character
Source: Royal Society of Chemistry journal article supplement (doi:10.1039/c9dt00903e), 2019-01-01
Supplement: c9dt00903e1.pdf [file c9dt00903e1.pdf]

Supporting Information

**Reaction of an N/Al FLP-Based Aluminum Hydride toward Alkyne: Deprotonated Aluminatation *versus* Hydroalumination with Regioselective *cis*-Addition Character**

Yilin Chen, Wenjun Jiang, Bin Li, Gang Fu\*, Shimin Chen, and Hongping Zhu\*

*State Key Laboratory of Physical Chemistry of Solid Surfaces, National Engineering Laboratory for Green Chemical Productions of Alcohols-Ethers-Esters, College of Chemistry and Chemical Engineering, Xiamen University, Xiamen, 361005, China*

**Content:**

**I. Crystal data and refinements**

**II. Collected  $^1\text{H}$ ,  $^{13}\text{C}$ , and/or  $^{29}\text{Si}$  and  $^{31}\text{P}$  NMR spectra of compounds 2–10 and  $[o\text{-(TMP)H-C}_6\text{H}_4]\text{Al}(\text{C}\equiv\text{CPh})_2(\text{C}\equiv\text{CPh}_2)$**

# I. Crystal data and refinements

Table S1 Crystal data and refinements

|                                                     | 3                                                                | 7                                                                |
|-----------------------------------------------------|------------------------------------------------------------------|------------------------------------------------------------------|
| CCDC                                                | 1898700                                                          | 1898701                                                          |
| Empirical formula                                   | C <sub>27</sub> H <sub>28</sub> AlNS <sub>2</sub>                | C <sub>44</sub> H <sub>61</sub> AlN <sub>2</sub> Si <sub>2</sub> |
| formula weight                                      | 457.60                                                           | 701.10                                                           |
| crystal system                                      | Orthorhombic                                                     | Monoclinic                                                       |
| space group                                         | <i>Pna</i> 2(1)                                                  | <i>P</i> 2(1)/ <i>c</i>                                          |
| <i>a</i> /Å                                         | 24.0988(9)                                                       | 11.3883(5)                                                       |
| <i>b</i> /Å                                         | 8.7010(3)                                                        | 19.6761(7)                                                       |
| <i>c</i> /Å                                         | 11.4918(5)                                                       | 18.8444(7)                                                       |
| <i>α</i> /deg                                       | 90                                                               | 90                                                               |
| <i>β</i> /deg                                       | 90                                                               | 100.654(4)                                                       |
| <i>γ</i> /deg                                       | 90                                                               | 90                                                               |
| <i>V</i> /Å <sup>3</sup>                            | 2409.64(16)                                                      | 4149.8(3)                                                        |
| <i>Z</i>                                            | 4                                                                | 4                                                                |
| $\rho_{\text{calcd}}/\text{g}\cdot\text{cm}^{-3}$   | 1.261                                                            | 1.122                                                            |
| $\mu/\text{mm}^{-1}$                                | 0.272                                                            | 0.138                                                            |
| <i>F</i> (000)                                      | 968                                                              | 1520                                                             |
| crystal size/mm <sup>3</sup>                        | 0.40×0.20×0.20                                                   | 0.40×0.40×0.30                                                   |
| $\theta$ range/deg                                  | 2.45–27.00                                                       | 2.34–24.00                                                       |
| index ranges                                        | –29 ≤ <i>h</i> ≤ 30<br>–11 ≤ <i>k</i> ≤ 5<br>–14 ≤ <i>l</i> ≤ 14 | –6 ≤ <i>h</i> ≤ 13<br>–20 ≤ <i>k</i> ≤ 22<br>–21 ≤ <i>l</i> ≤ 20 |
| collected data                                      | 7072                                                             | 14303                                                            |
| unique data                                         | 4642 (0.0285)                                                    | 6484 (0.0491)                                                    |
| completeness to $\theta$                            | 99.8                                                             | 99.7                                                             |
| data/restraints/parameters                          | 4642/291/330                                                     | 6484/0/461                                                       |
| GOF on $F^2$                                        | 1.036                                                            | 1.046                                                            |
| final <i>R</i> indices [ <i>I</i> > 2 ( <i>I</i> )] | 0.0457/0.1027                                                    | 0.0609/0.1419                                                    |
| <i>R</i> indices (all data)                         | 0.0548/0.1081                                                    | 0.0802/0.1526                                                    |
| Largest diff peak/hole (e·Å <sup>–3</sup> )         | 0.214/–0.370                                                     | 0.557/–0.361                                                     |

$$^a R_1 = \sum(|F_o| - |F_c|) / \sum|F_o|, wR_2 = [\sum w(F_o^2 - F_c^2)^2 / \sum w(F_o^2)]^{1/2}, \text{GOF} = [\sum w(F_o^2 - F_c^2)^2 / (N_o - N_p)]^{1/2}.$$

(to be continued)

|                                                     | <b>8<sub>0.5</sub> C<sub>6</sub>D<sub>6</sub></b>                | <b>9</b>                                                          |
|-----------------------------------------------------|------------------------------------------------------------------|-------------------------------------------------------------------|
| CCDC                                                | 1898699                                                          | 1898702                                                           |
| Empirical formula                                   | C <sub>41</sub> H <sub>45</sub> AlNP                             | C <sub>47</sub> H <sub>58</sub> AlNP <sub>2</sub> Si <sub>2</sub> |
| formula weight                                      | 609.73                                                           | 782.04                                                            |
| crystal system                                      | Monoclinic                                                       | Monoclinic                                                        |
| space group                                         | <i>P</i> 2(1)/ <i>c</i>                                          | <i>P</i> 2(1)/ <i>c</i>                                           |
| <i>a</i> /Å                                         | 13.9919(3)                                                       | 11.3543(14)                                                       |
| <i>b</i> /Å                                         | 14.7539(4)                                                       | 17.4839(10)                                                       |
| <i>c</i> /Å                                         | 18.7760(4)                                                       | 22.6998(19)                                                       |
| $\alpha$ /deg                                       | 90                                                               | 90                                                                |
| $\beta$ /deg                                        | 92.469(2)                                                        | 98.930(9)                                                         |
| $\gamma$ /deg                                       | 90                                                               | 90                                                                |
| <i>V</i> /Å <sup>3</sup>                            | 3872.43(16)                                                      | 4451.7(7)                                                         |
| <i>Z</i>                                            | 4                                                                | 4                                                                 |
| $\rho_{\text{calcd}}$ /g·cm <sup>-3</sup>           | 1.046                                                            | 1.167                                                             |
| $\mu$ /mm <sup>-1</sup>                             | 1.032                                                            | 0.204                                                             |
| <i>F</i> (000)                                      | 1304                                                             | 1672                                                              |
| crystal size/mm <sup>3</sup>                        | 0.30×0.30×0.20                                                   | 0.28×0.26×0.20                                                    |
| $\theta$ range/deg                                  | 3.81–62.12                                                       | 2.16–28.00                                                        |
| index ranges                                        | –16 ≤ <i>h</i> ≤ 15<br>–16 ≤ <i>k</i> ≤ 8<br>–21 ≤ <i>l</i> ≤ 14 | –10 ≤ <i>h</i> ≤ 14<br>–18 ≤ <i>k</i> ≤ 23<br>–29 ≤ <i>l</i> ≤ 27 |
| collected data                                      | 12606                                                            | 21386                                                             |
| unique data                                         | 6022 (0.0249)                                                    | 10582 (0.0515)                                                    |
| completeness to $\theta$                            | 98.5                                                             | 98.6                                                              |
| data/restraints/parameters                          | 6022/0/387                                                       | 10582/3/494                                                       |
| GOF on <i>F</i> <sup>2</sup>                        | 1.041                                                            | 1.028                                                             |
| final <i>R</i> indices [ <i>I</i> > 2 ( <i>I</i> )] | 0.0696/0.1986                                                    | 0.0700/0.1296                                                     |
| <i>R</i> indices (all data)                         | 0.0775/0.2129                                                    | 0.1181/0.1461                                                     |
| Largest diff peak/hole (e·Å <sup>-3</sup> )         | 1.047/–0.259                                                     | 0.659/–0.425                                                      |

$$^a R_1 = \sum(|F_o| - |F_c|)/\sum|F_o|, wR_2 = [\sum w(F_o^2 - F_c^2)^2/\sum w(F_o^2)]^{1/2}, \text{GOF} = [\sum w(F_o^2 - F_c^2)^2/(N_o - N_p)]^{1/2}.$$

### Crystallographic data for compound [o-(TMP)H-C<sub>6</sub>H<sub>4</sub>]AlCl<sub>0.28164</sub>(C≡CPh<sub>2</sub>)<sub>2.71856</sub>

This is according to the reviewer's comment on the structure of compound **4**. We carefully recheck the previous structure solution and finally refined the structure into [o-(TMP)H-C<sub>6</sub>H<sub>4</sub>]AlCl<sub>0.28164</sub>(C≡CPh<sub>2</sub>)<sub>2.71856</sub>. In order to offer an approximate structure view to **4**, we showed crystallographic data of [o-(TMP)H-C<sub>6</sub>H<sub>4</sub>]AlCl<sub>0.28164</sub>(C≡CPh<sub>2</sub>)<sub>2.71856</sub> herein along with the related bond parameters.

The crystallographic data of compound [o-(TMP)H-C<sub>6</sub>H<sub>4</sub>]AlCl<sub>0.28164</sub>(C≡CPh<sub>2</sub>)<sub>2.71856</sub> (previously named as **4**) was collected on a Rigaku Oxford Diffraction system. During measurements a graphite-monochromatic Cu-K $\alpha$  radiation ( $\lambda = 1.54178$  Å) was applied. Absorption corrections were all employed using the spherical harmonics program (multi-scan type). The structure was solved by direct methods (SHELXS-96)<sup>15</sup> and refined against *F*<sup>2</sup> using SHELXL-2014.<sup>16</sup> In

general, the non-hydrogen atoms were located by difference Fourier synthesis and refined anisotropically, and hydrogen atoms were included using a riding mode with  $U_{\text{iso}}$  tied to the  $U_{\text{iso}}$  of the parent atoms unless otherwise specified. In  $[o\text{-(TMP)H-C}_6\text{H}_4]\text{AlCl}_{0.28164}(\text{C}\equiv\text{CPh}_2)_{2.71856}$ , the Cl atoms and  $\text{C}\equiv\text{CPh}_2$  groups were disordered, which were treated by the PART method. Final refinement gave Cl(1) (0.12443) and C(3)C(4)P(2)C(34)C(35)C(36)C(37)C(38)C(39)C(40)C(41)C(42)C(43)C(44)C(45) (0.87557) and Cl(2) (0.15837) and C(5)C(6)P(3)C(46)C(47)C(48)C(49)C(50)C(51)C(52)C(53)C(54)-C(55)C(56)C(57) (0.84163). A summary of cell parameters, data collection, and structure solution and refinements is given in Table S2 and the crystal structure is shown in Figure S11.

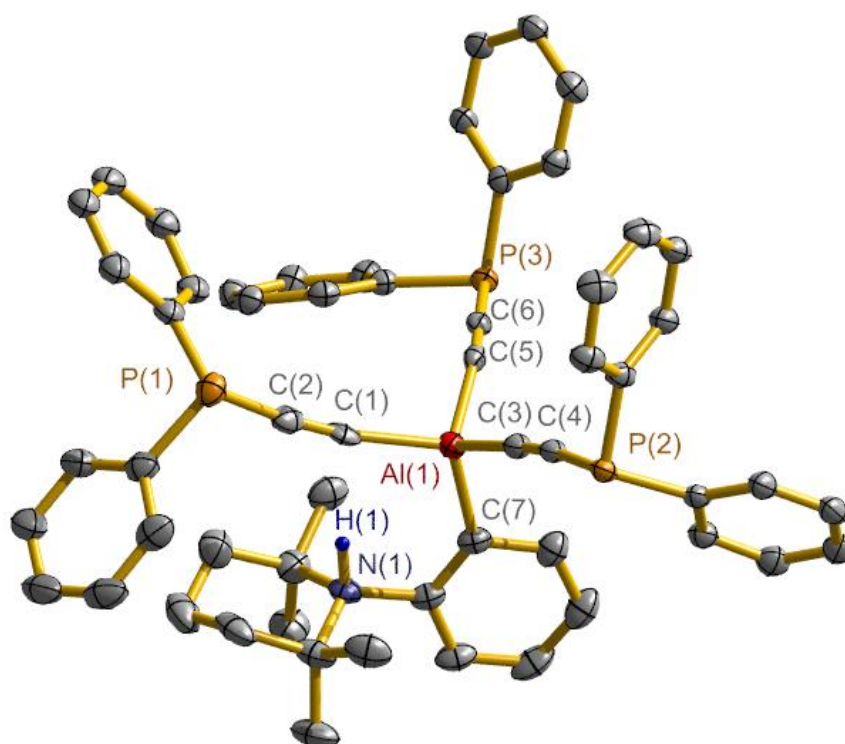

**Figure S11.** X-ray crystal structure of  $[o\text{-(TMP)H-C}_6\text{H}_4]\text{AlCl}_{0.28164}(\text{C}\equiv\text{CPh}_2)_{2.71856}$  with thermal ellipsoids at 50% probability level. The NH hydrogen atom is enhanced and the other H atoms and the Cl atoms are omitted for clarity. Selected bond lengths (Å) and angles (°): Al(1)–C(1) 2.023(3), Al(1)–C(3) 1.984(5), Al(1)–C(5) 2.051(7), Al(1)–C(7) 2.006(3), C(1)–C(2) 1.146(4), C(3)–C(4) 1.160(6), C(5)–C(6) 1.132(8), Al(1)–Cl(1) 2.405(10), Al(1)–Cl(2) 2.318(8); C(1)–Al(1)–C(3) 107.79(15), C(1)–Al(1)–C(5) 108.0(2), C(3)–Al(1)–C(5) 114.1(3), C(1)–Al(1)–C(7) 115.13(11), C(3)–Al(1)–C(7) 106.81(16), C(5)–Al(1)–C(7) 105.2(3).

#### Crystallographic data for compound (*o*-TMP-C<sub>6</sub>H<sub>4</sub>)AlH(CPh=CH<sub>2</sub>Et) (6)

This is according to the reviewer's comment. We repeated the reaction of **1** and  $\text{PhC}\equiv\text{CEt}$  and obtained the single-crystals. The solution data was not good probably due to not good quality of the crystals. In order to offer an approximate structure view to **6**, we showed crystallographic data herein along with the related bond parameters.

The crystallographic data of compound **6** was collected on a Rigaku Oxford Diffraction system. During measurements a graphite-monochromatic Cu-K $\alpha$  radiation ( $\lambda = 1.54178$  Å) was applied. Absorption corrections were all employed using the spherical harmonics program (multi-scan type). The structure was solved by direct methods (SHELXS-96)<sup>15</sup> and refined against  $F^2$  using SHELXL-2014.<sup>16</sup> In general, the non-hydrogen atoms were located by difference Fourier synthesis and refined anisotropically, and hydrogen atoms were included using a riding mode with  $U_{\text{iso}}$  tied to the  $U_{\text{iso}}$  of the parent atoms unless otherwise specified. In **6**, a half moiety was disclosed and the whole molecule as a dimer was obtained by the centrosymmetric operation. The H atom attached at Al atom was located from the difference Fourier synthesis and refined isotropically. A summary of cell parameters, data collection, and structure solution and refinements is given in Table S2 and the crystal structure is shown in Figure S12.

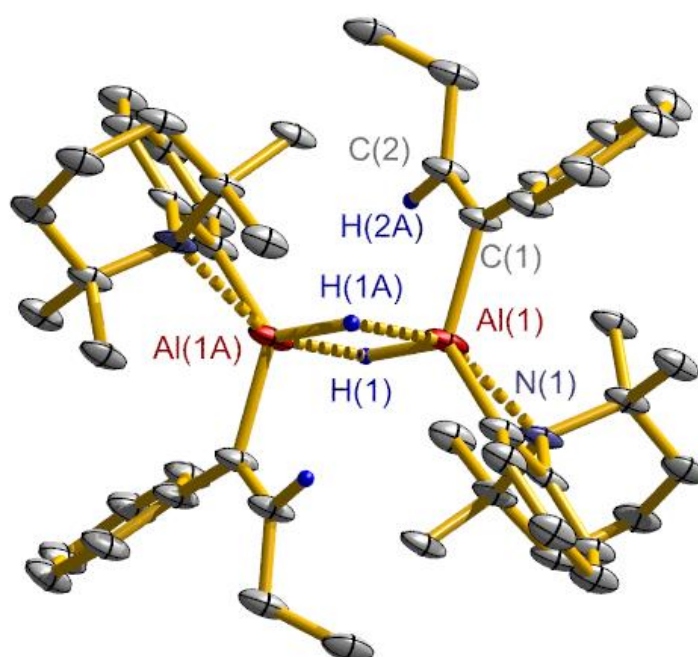

**Figure S12.** X-ray crystal structure of **6** with thermal ellipsoids at 50% probability level. The =CH and AlH hydrogen atoms are enhanced and the other H atoms are omitted for clarity. Selected bond lengths (Å) and angles (°): Al(1)–C(1) 1.984(4), Al(1)–C(11) 1.958(4), Al(1)–N(1) 2.429(4), Al(1)–H(1) 1.47(5), Al(1)–H(1A) 1.847(5), C(1)–C(2) 1.329(9); C(1)–Al(1)–C(11) 127.87(18), C(1)–Al(1)–N(1) 112.72(18), N(1)–Al(1)–C(11) 64.48(17). Symmetric code:  $-x, -y, -z+1$ .

**Table S2 Crystal data and refinements**

|                                                     | <b>4</b>                                                                      | <b>6<sub>2</sub></b>                                              |
|-----------------------------------------------------|-------------------------------------------------------------------------------|-------------------------------------------------------------------|
| Empirical formula                                   | C <sub>53.31</sub> H <sub>50.18</sub> AlCl <sub>0.28</sub> NP <sub>2.72</sub> | C <sub>50</sub> H <sub>68</sub> Al <sub>2</sub> N <sub>2</sub>    |
| formula weight                                      | 825.97                                                                        | 751.02                                                            |
| crystal system                                      | Monoclinic                                                                    | Monoclinic                                                        |
| space group                                         | <i>P</i> 2(1)/ <i>c</i>                                                       | <i>P</i> 2(1)/ <i>n</i>                                           |
| <i>a</i> /Å                                         | 8.93330(10)                                                                   | 9.3269(2)                                                         |
| <i>b</i> /Å                                         | 22.33240(10)                                                                  | 19.3988(5)                                                        |
| <i>c</i> /Å                                         | 23.8932(2)                                                                    | 12.1298(2)                                                        |
| <i>α</i> /deg                                       | 90                                                                            | 90                                                                |
| <i>β</i> /deg                                       | 92.5560(10)                                                                   | 90.591(2)                                                         |
| <i>γ</i> /deg                                       | 90                                                                            | 90                                                                |
| <i>V</i> /Å <sup>3</sup>                            | 4762.00(7)                                                                    | 2191.54(8)                                                        |
| <i>Z</i>                                            | 4                                                                             | 2                                                                 |
| $\rho_{\text{calcd}}/\text{g}\cdot\text{cm}^{-3}$   | 1.152                                                                         | 1.137                                                             |
| $\mu/\text{mm}^{-1}$                                | 1.640                                                                         | 0.850                                                             |
| <i>F</i> (000)                                      | 1742                                                                          | 816                                                               |
| crystal size/mm <sup>3</sup>                        | 0.30×0.30×0.20                                                                | 0.20×0.20×0.10                                                    |
| $\theta$ range/deg                                  | 3.96–74.09                                                                    | 4.30–72.47                                                        |
| index ranges                                        | –11 ≤ <i>h</i> ≤ 10<br>–27 ≤ <i>k</i> ≤ 27<br>–29 ≤ <i>l</i> ≤ 28             | –11 ≤ <i>h</i> ≤ 10<br>–23 ≤ <i>k</i> ≤ 21<br>–15 ≤ <i>l</i> ≤ 14 |
| collected data                                      | 61274                                                                         | 16863                                                             |
| unique data                                         | 9486 (0.0455)                                                                 | 4308 (0.1555)                                                     |
| completeness to $\theta$                            | 98.1                                                                          | 99.0                                                              |
| data/restraints/parameters                          | 9486/1512/587                                                                 | 4308/0/254                                                        |
| GOF on <i>F</i> <sup>2</sup>                        | 1.042                                                                         | 2.111                                                             |
| final <i>R</i> indices [ <i>I</i> > 2 ( <i>I</i> )] | 0.0754/0.2095                                                                 | 0.1528/0.4372                                                     |
| <i>R</i> indices (all data)                         | 0.0774/0.2119                                                                 | 0.1695/0.4806                                                     |
| Largest diff peak/hole (e·Å <sup>–3</sup> )         | 1.026/–0.778                                                                  | 0.852/–2.151                                                      |

$$^a R_1 = \sum(|F_o| - |F_c|) / \sum|F_o|, wR_2 = [\sum w(F_o^2 - F_c^2)^2 / \sum w(F_o^2)]^{1/2}, \text{GOF} = [\sum w(F_o^2 - F_c^2) / (N_o - N_p)]^{1/2}.$$

II. Collected  $^1\text{H}$ ,  $^{13}\text{C}$  and/or  $^{29}\text{Si}$  and  $^{31}\text{P}$  spectra of compounds 2-10 and  $[o\text{-(TMP)H-C}_6\text{H}_4]\text{Al}(\text{C}\equiv\text{CPh})_2(\text{C}\equiv\text{CPhPh}_2)$ .

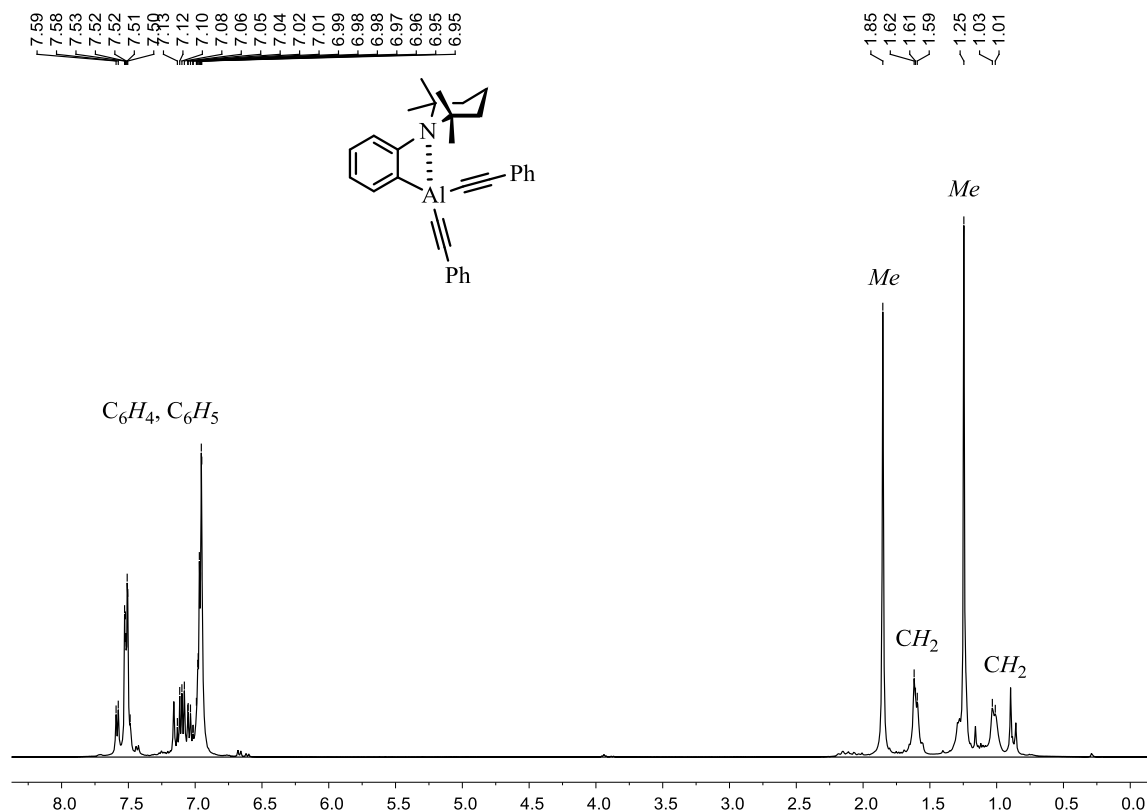

Figure S1-1.  $^1\text{H}$  NMR spectrum of **2** in  $\text{C}_6\text{D}_6$  at 298 K

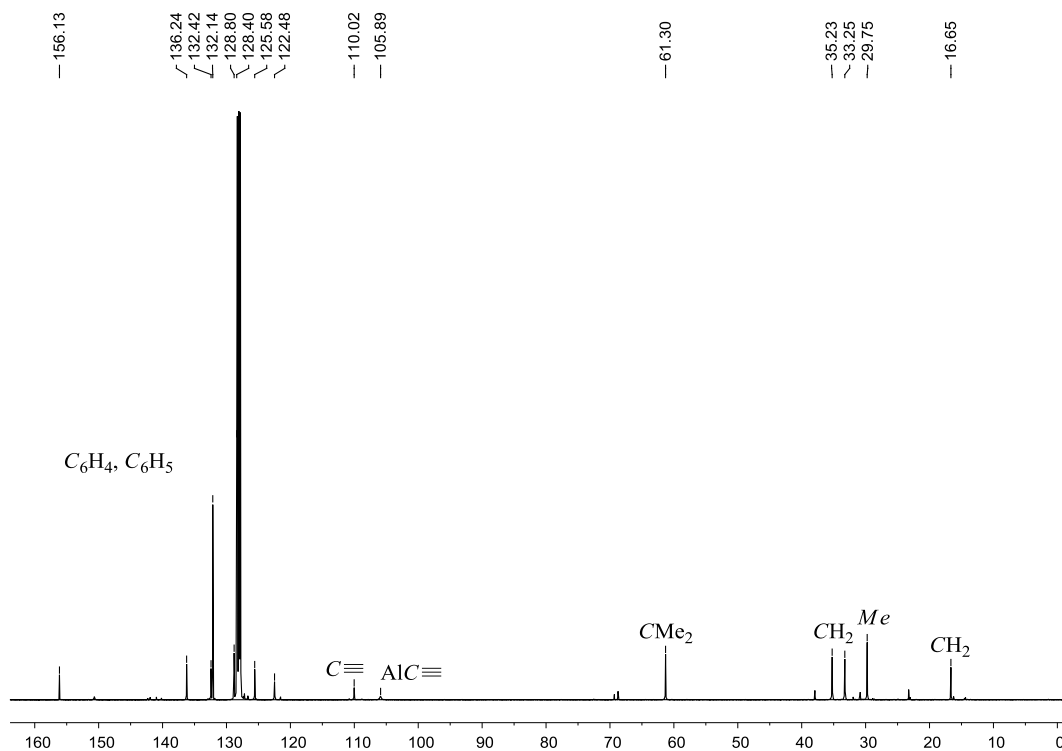

Figure S1-2.  $^{13}\text{C}$  NMR spectrum of **2** in  $\text{C}_6\text{D}_6$  at 298 K

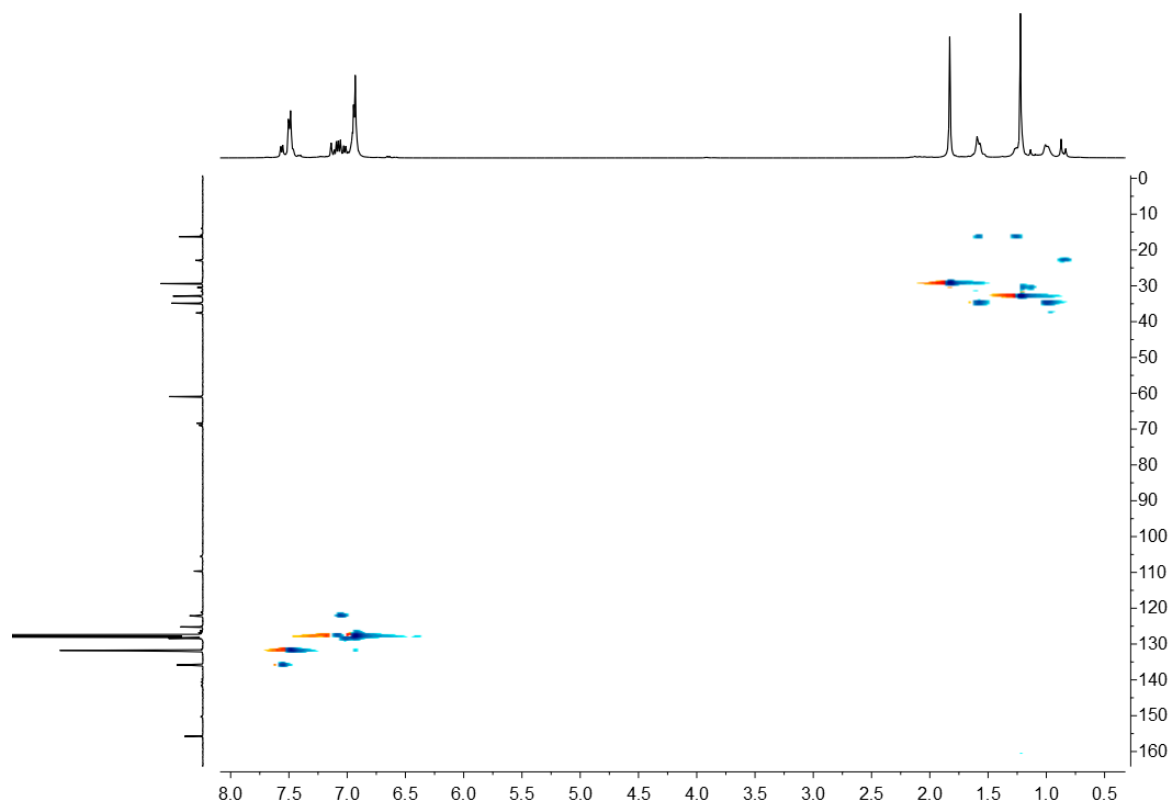

**Figure S1-3.**  $^1\text{H}$ ,  $^{13}\text{C}$ -HSQC spectrum of **2** in  $\text{C}_6\text{D}_6$  at 298 K

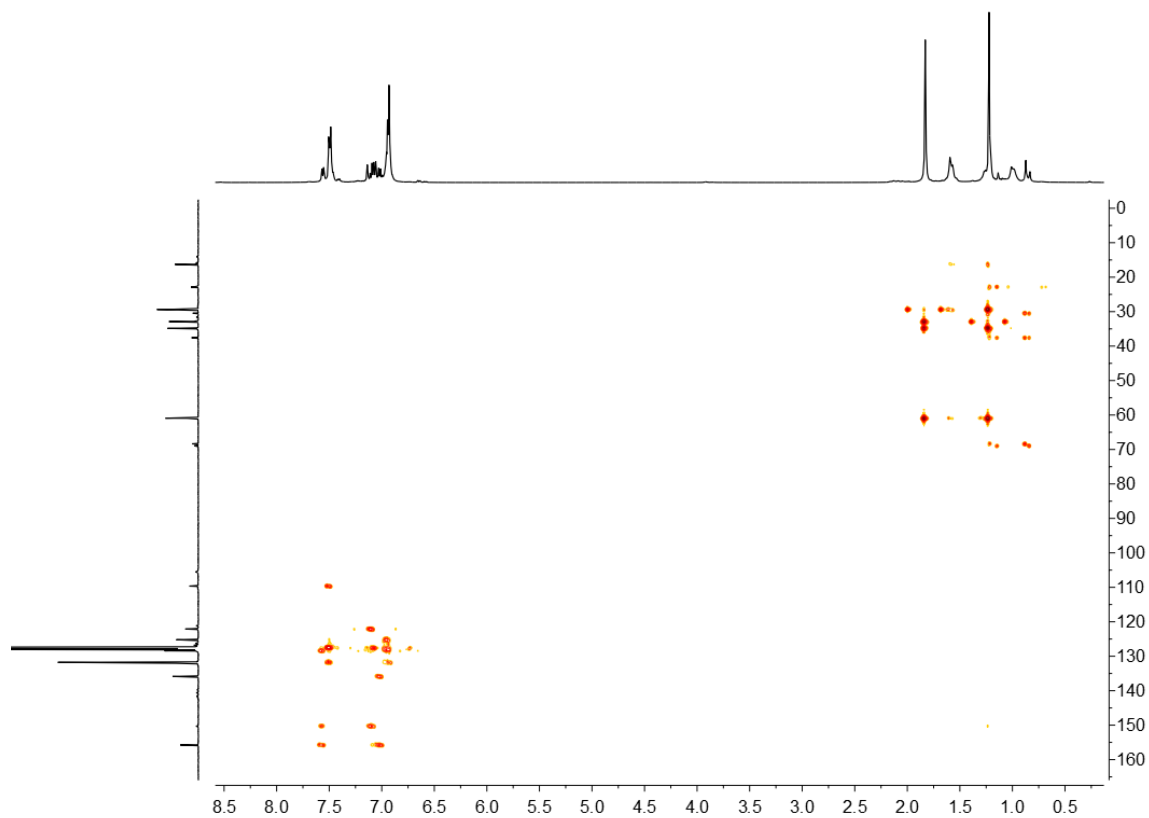

**Figure S1-4.**  $^1\text{H}$ ,  $^{13}\text{C}$ -HMBC spectrum of **2** in  $\text{C}_6\text{D}_6$  at 298 K

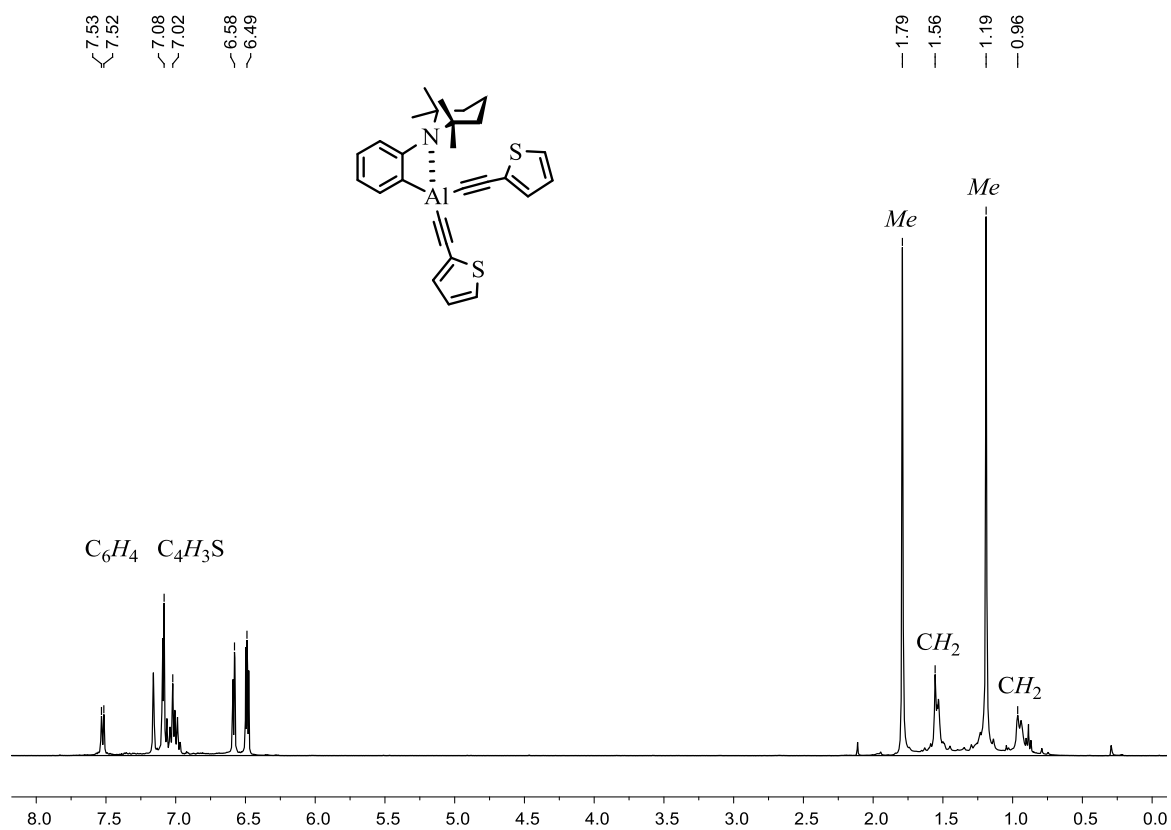

**Figure S2-1.** <sup>1</sup>H NMR spectrum of **3** in C<sub>6</sub>D<sub>6</sub> at 298 K

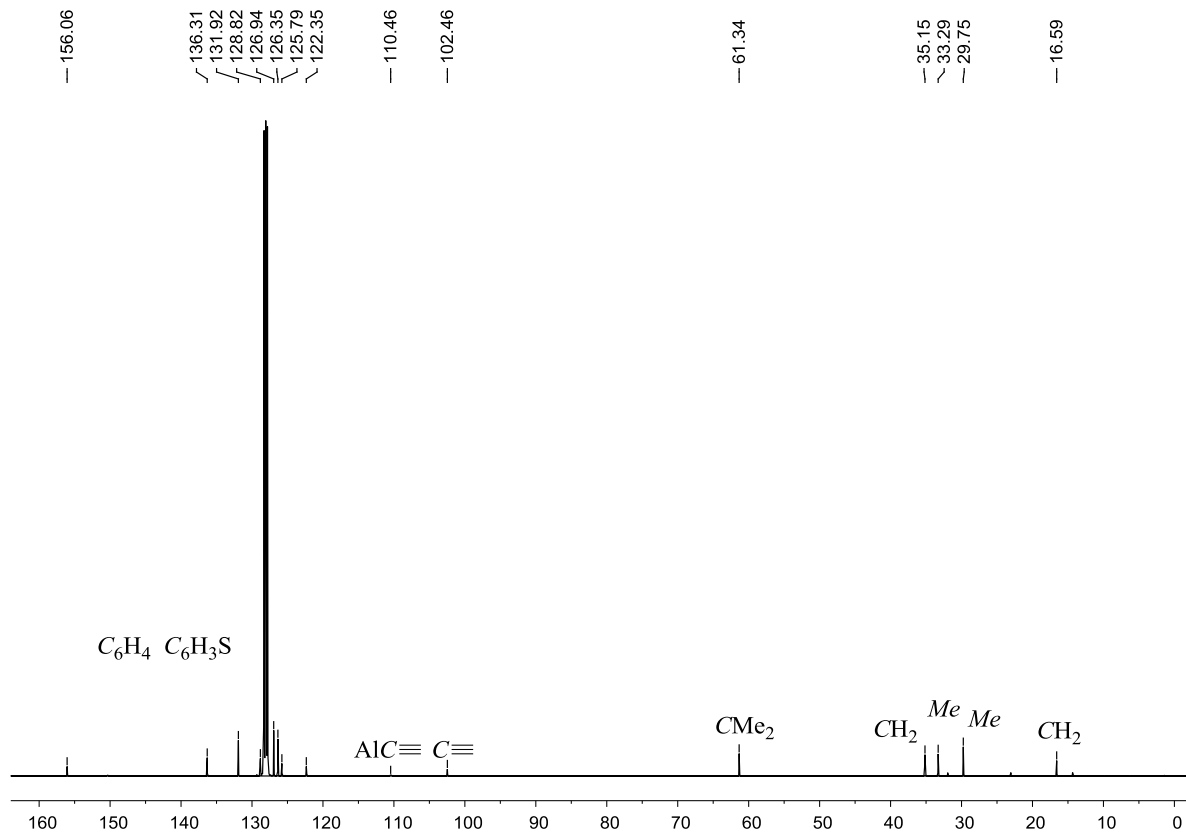

**Figure S2-2.** <sup>13</sup>C NMR spectrum of **3** in C<sub>6</sub>D<sub>6</sub> at 298 K

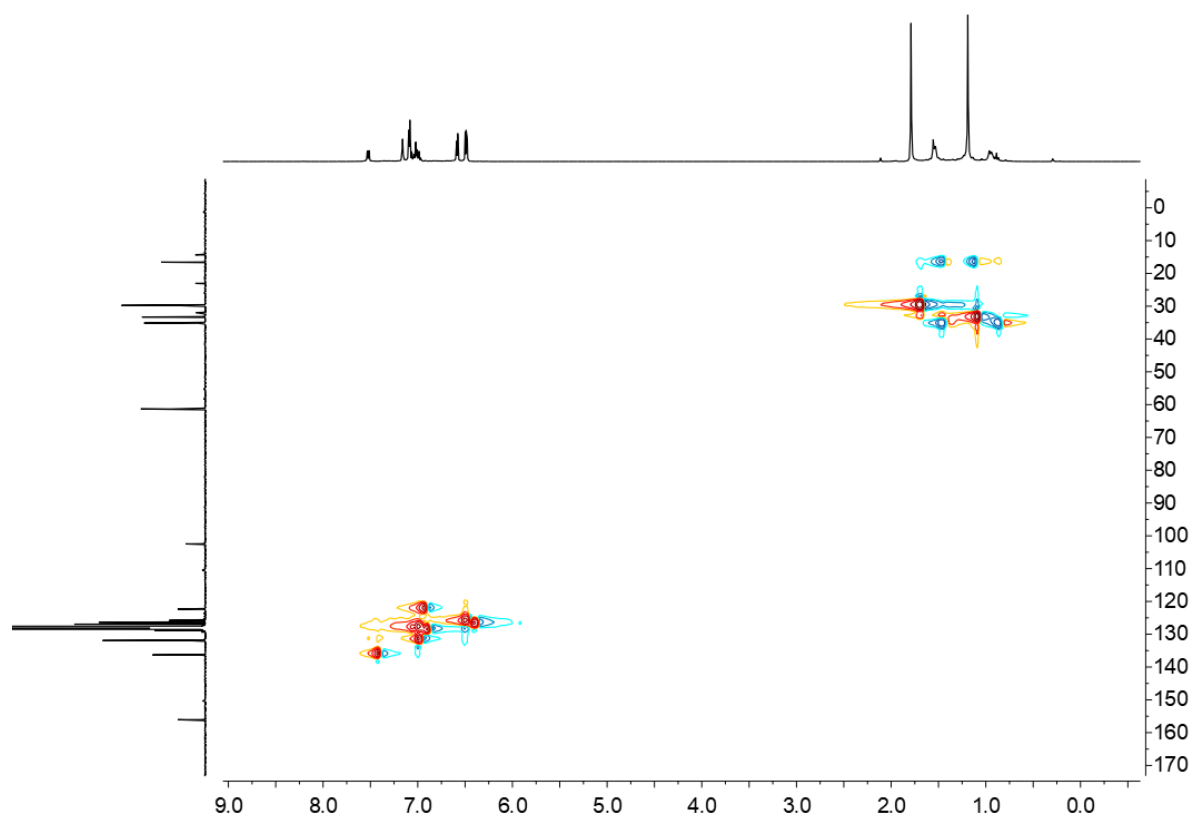

**Figure S2-3.**  $^1\text{H}$ ,  $^{13}\text{C}$ -HSQC spectrum of **3** in  $\text{C}_6\text{D}_6$  at 298 K

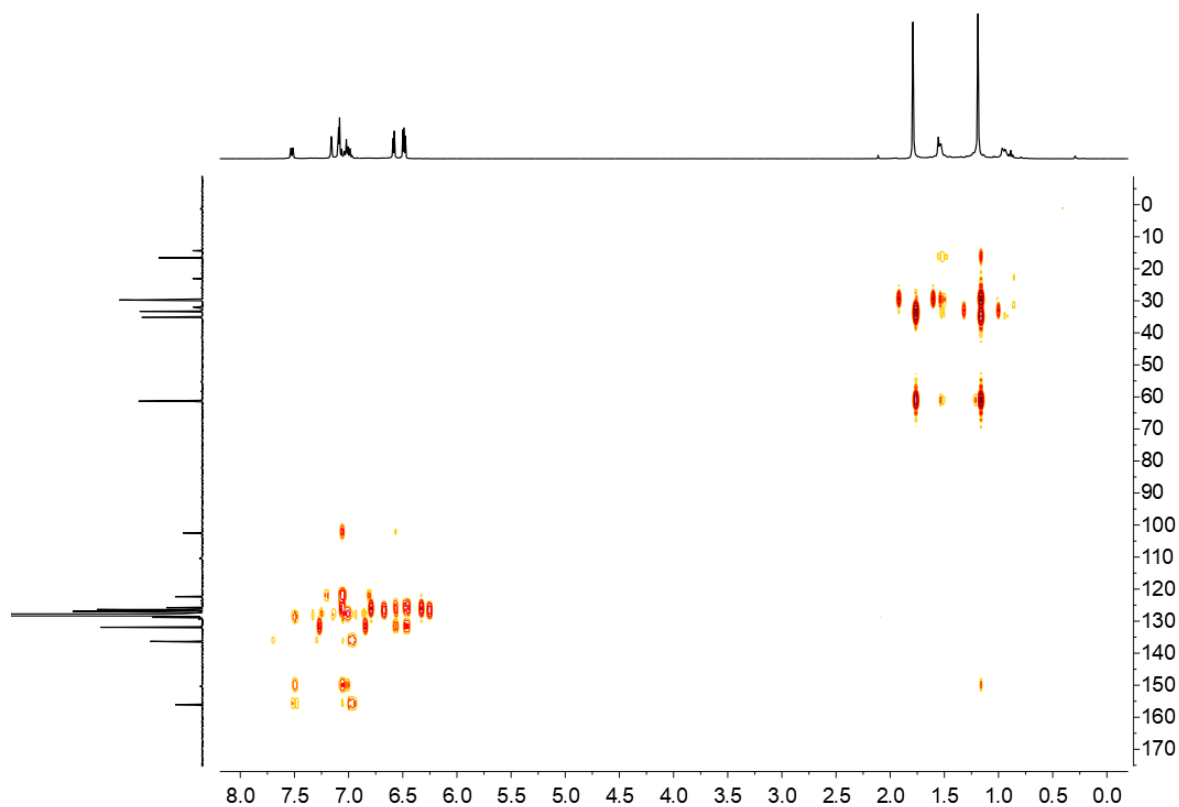

**Figure S2-4.**  $^1\text{H}$ ,  $^{13}\text{C}$ -HMBC spectrum of **3** in  $\text{C}_6\text{D}_6$  at 298 K



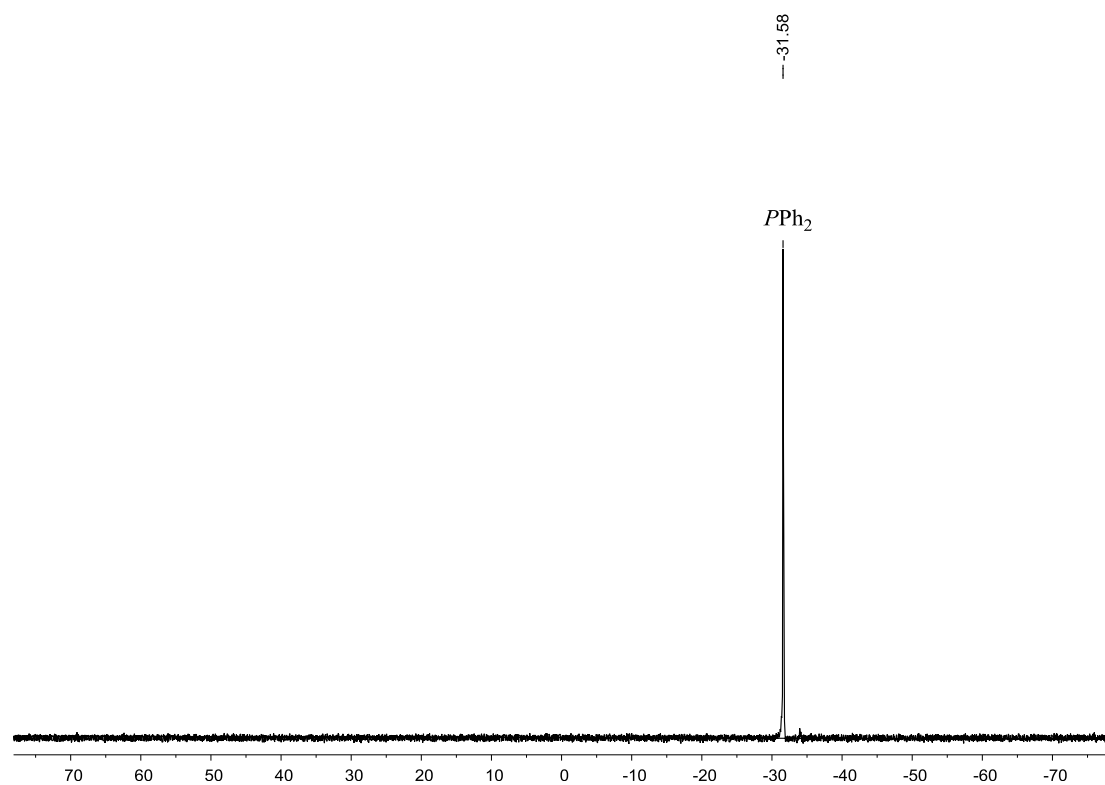

**Figure S3-3.**  $^{31}\text{P}$  NMR spectrum of **4** in  $\text{CDCl}_3$  at 298 K

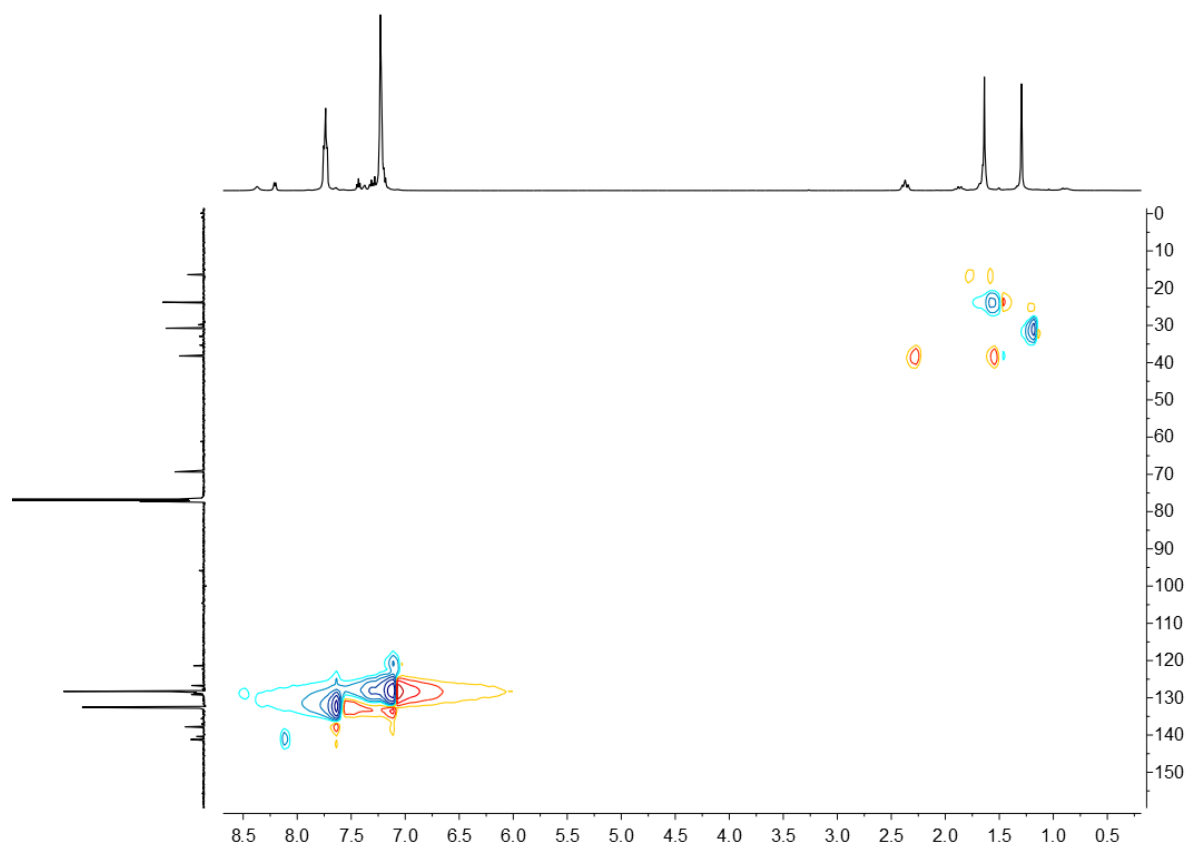

**Figure S3-4.**  $^1\text{H}$ ,  $^{13}\text{C}$ -HSQC spectrum of **4** in  $\text{CDCl}_3$  at 298 K

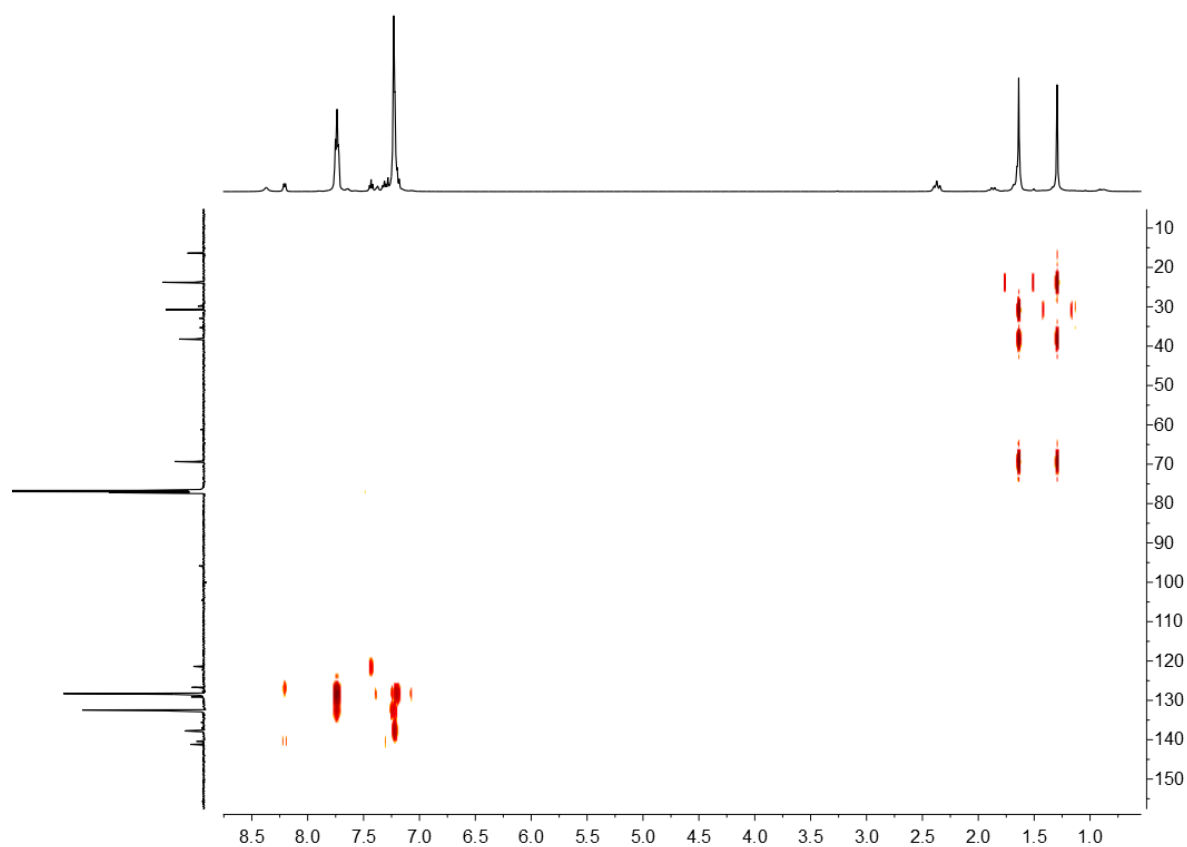

**Figure S3-5.**  $^1\text{H}$ ,  $^{13}\text{C}$ -HMBC spectrum of **4** in  $\text{CDCl}_3$  at 298 K

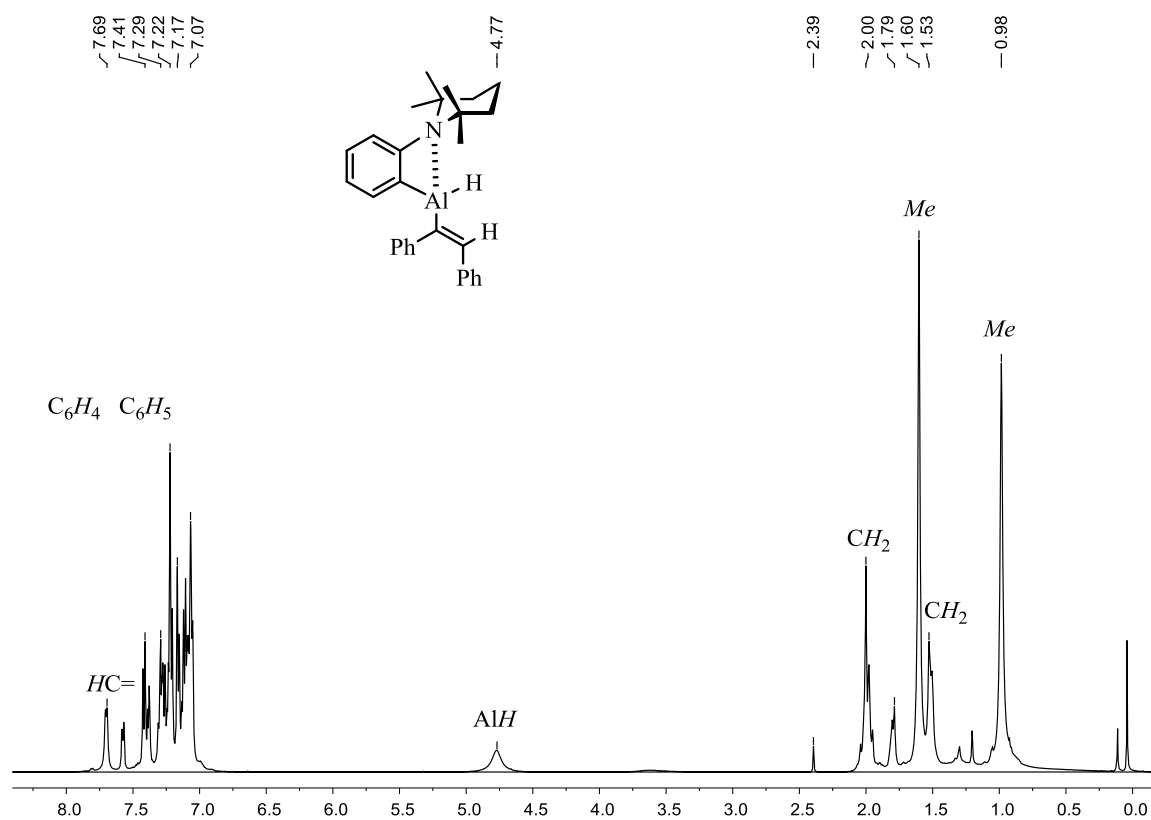

**Figure S4-1.**  $^1\text{H}$  NMR spectrum of **5** in  $\text{CDCl}_3$  at 298 K

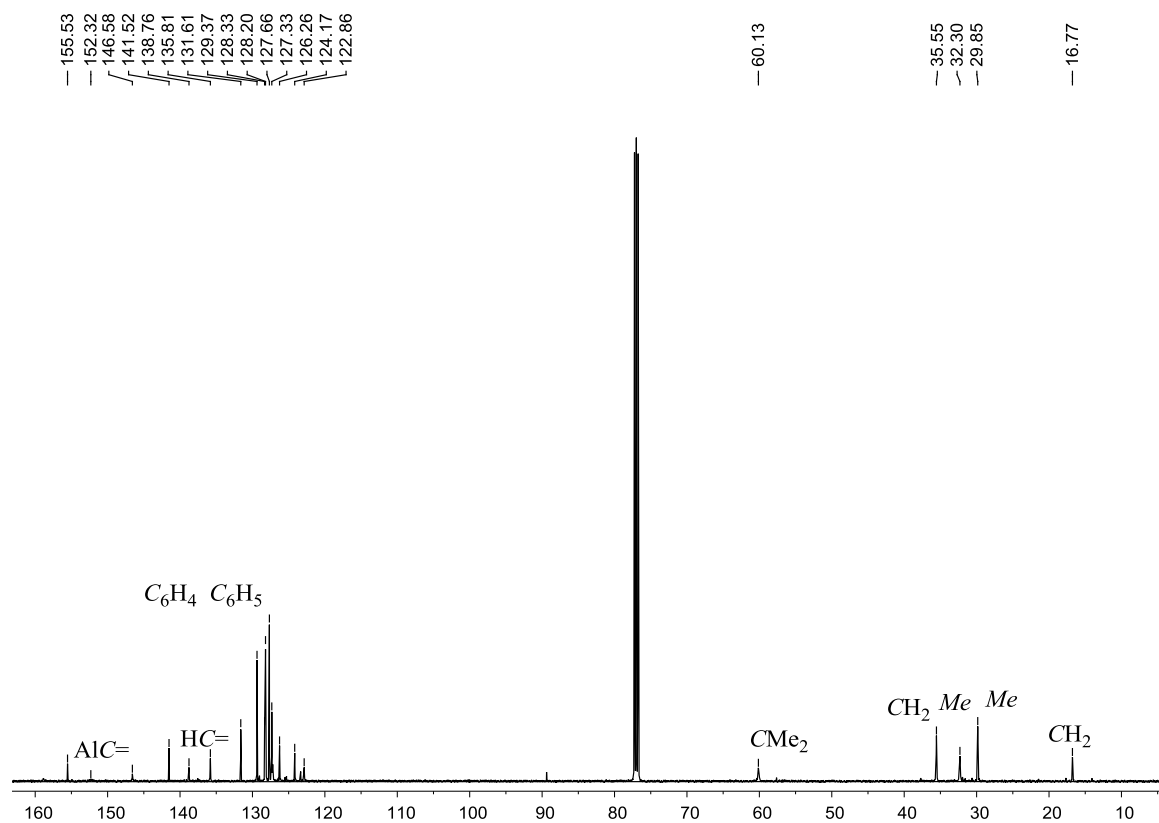

**Figure S4-2.**  $^{13}C$  NMR spectrum of **5** in  $CDCl_3$  at 298 K

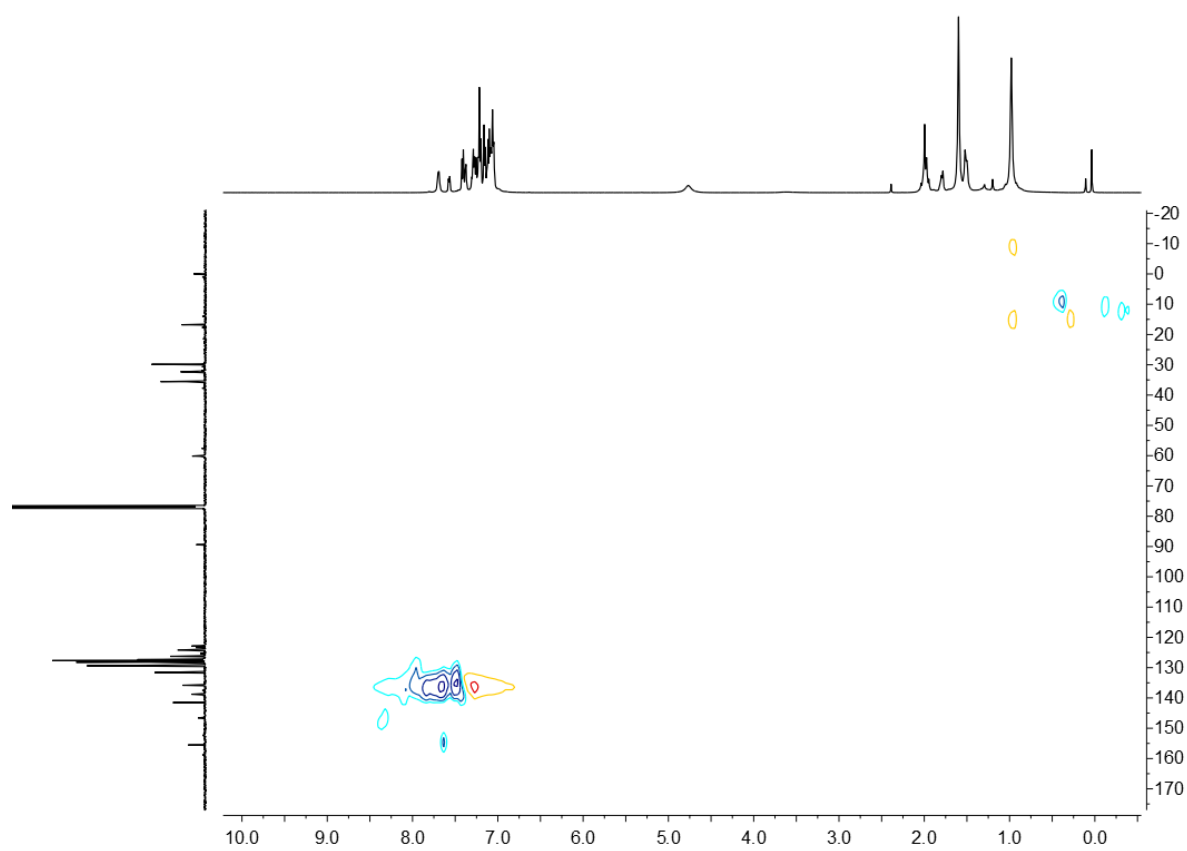

**Figure S4-3.**  $^1H, ^{13}C$ -HSQC spectrum of **5** in  $CDCl_3$  at 298 K

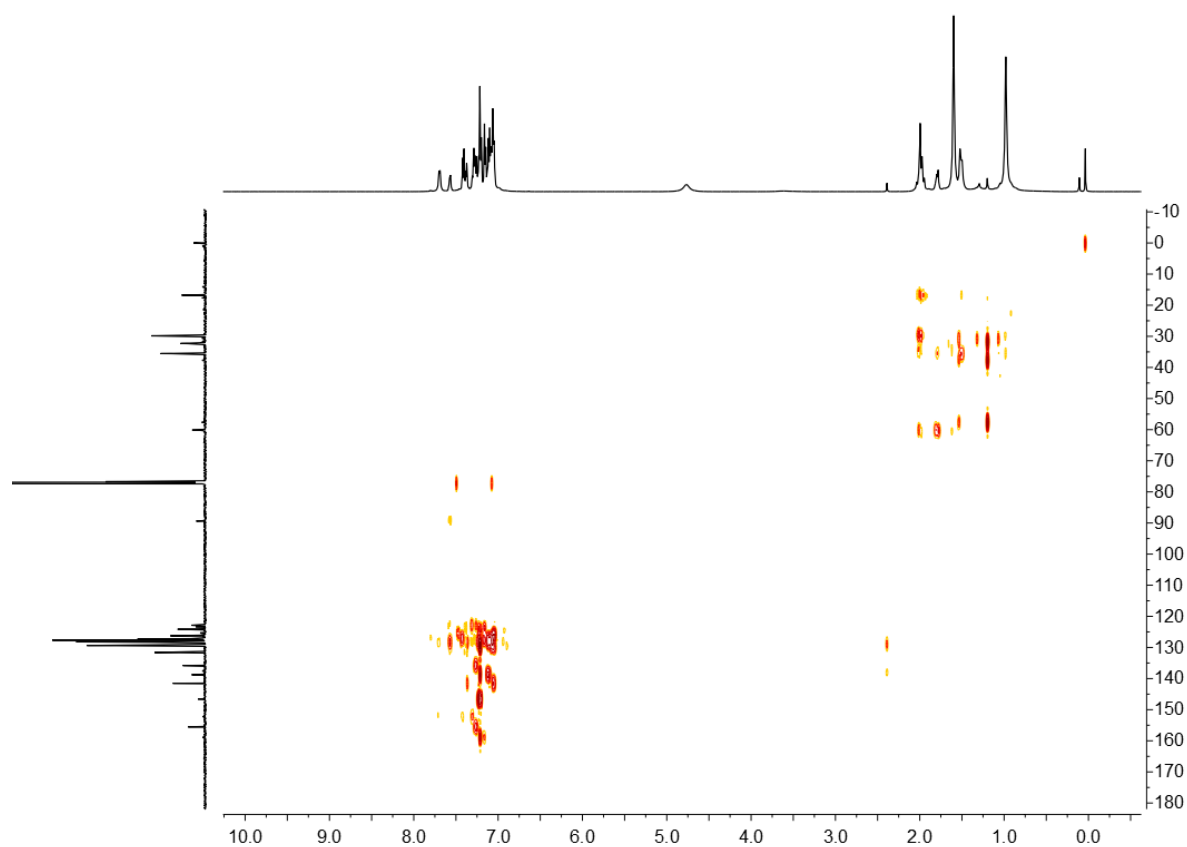

**Figure S4-4.**  $^1\text{H}$ ,  $^{13}\text{C}$ -HMBC spectrum of **5** in  $\text{CDCl}_3$  at 298 K

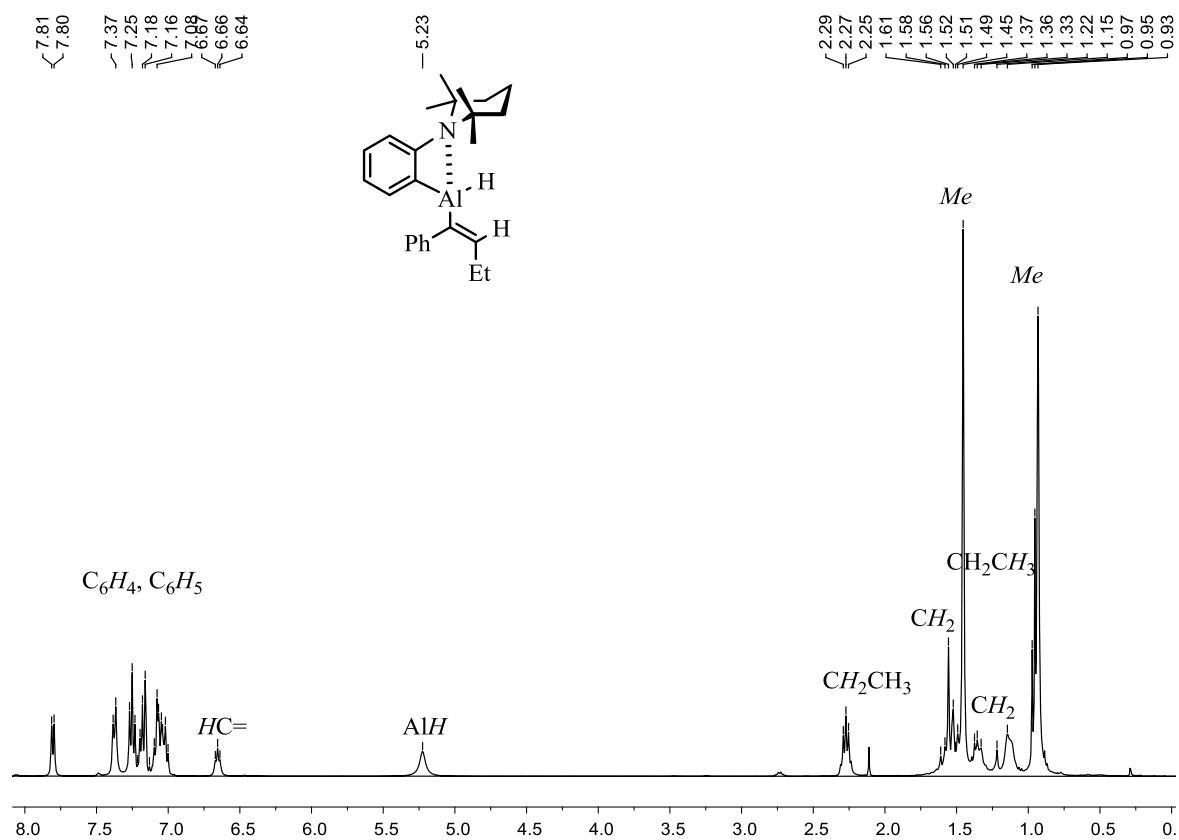

**Figure S5-1.**  $^1\text{H}$  NMR spectrum of **6** in  $\text{C}_6\text{D}_6$  at 298 K

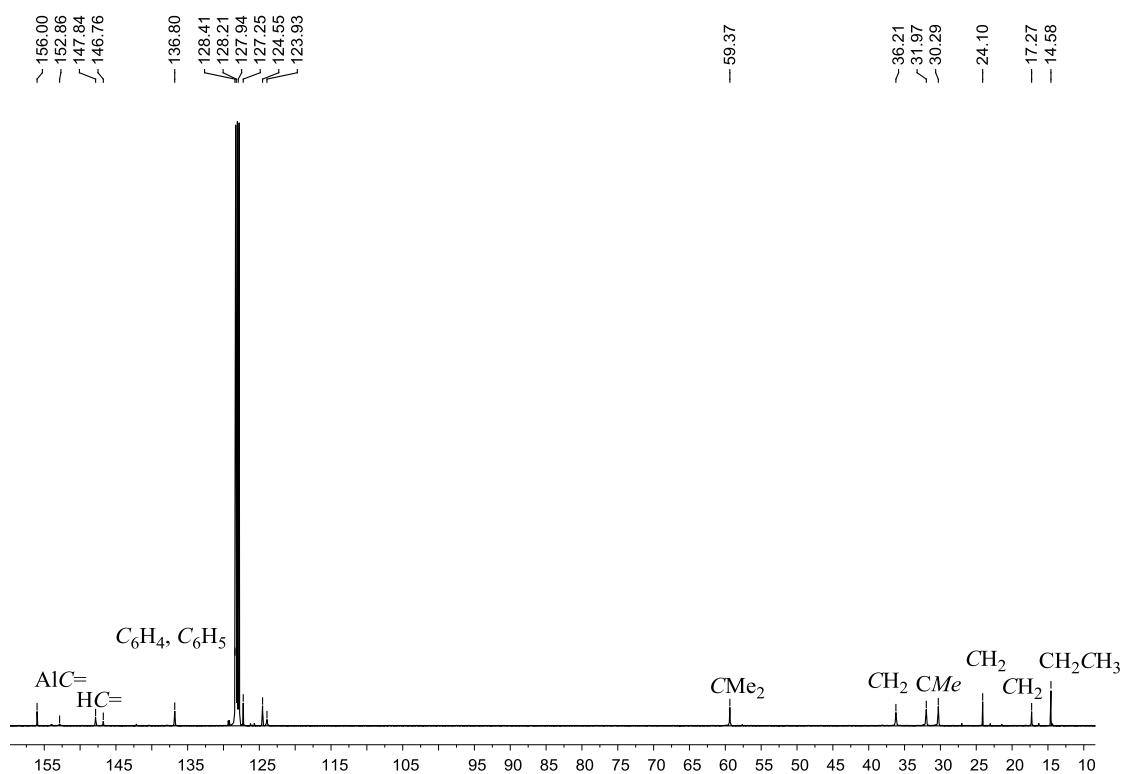

**Figure S5-2.** <sup>13</sup>C NMR spectrum of **6** in C<sub>6</sub>D<sub>6</sub> at 298 K

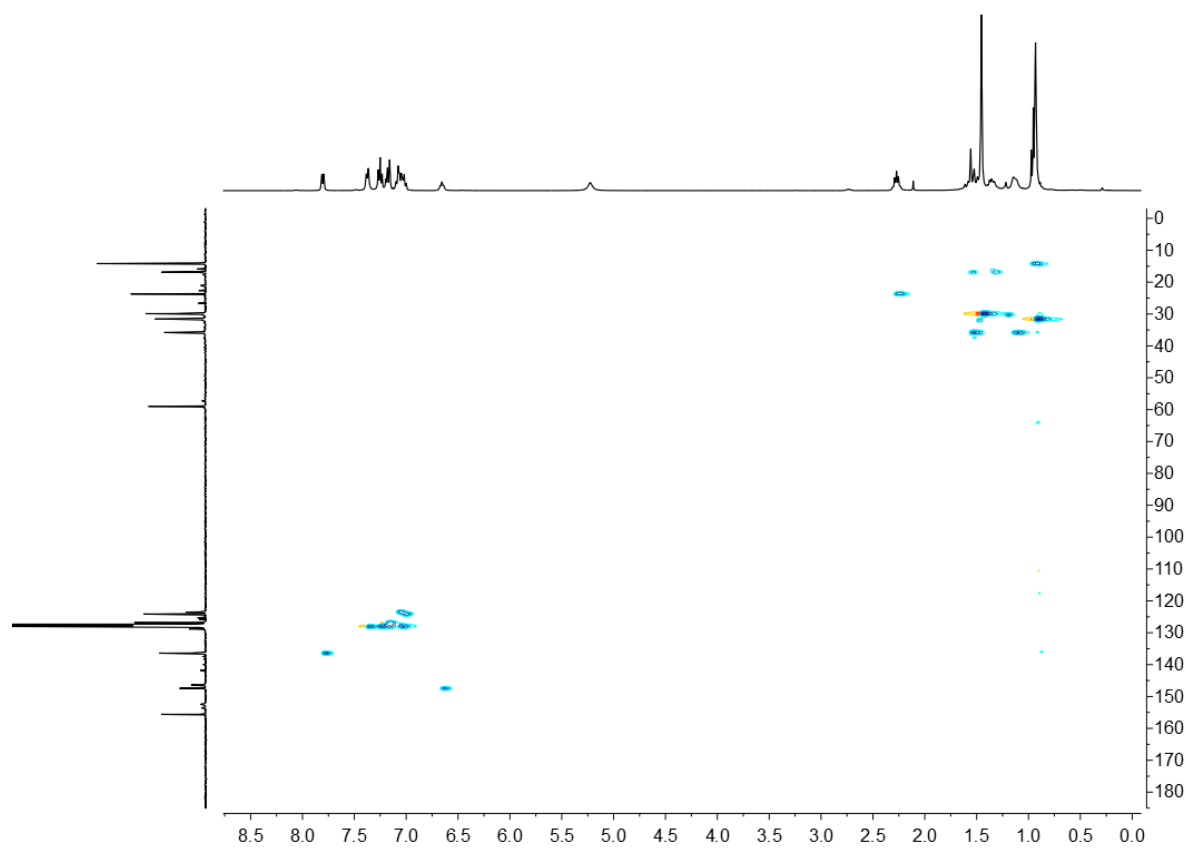

**Figure S5-3.** <sup>1</sup>H, <sup>13</sup>C-HSQC spectrum of **6** in C<sub>6</sub>D<sub>6</sub> at 298 K

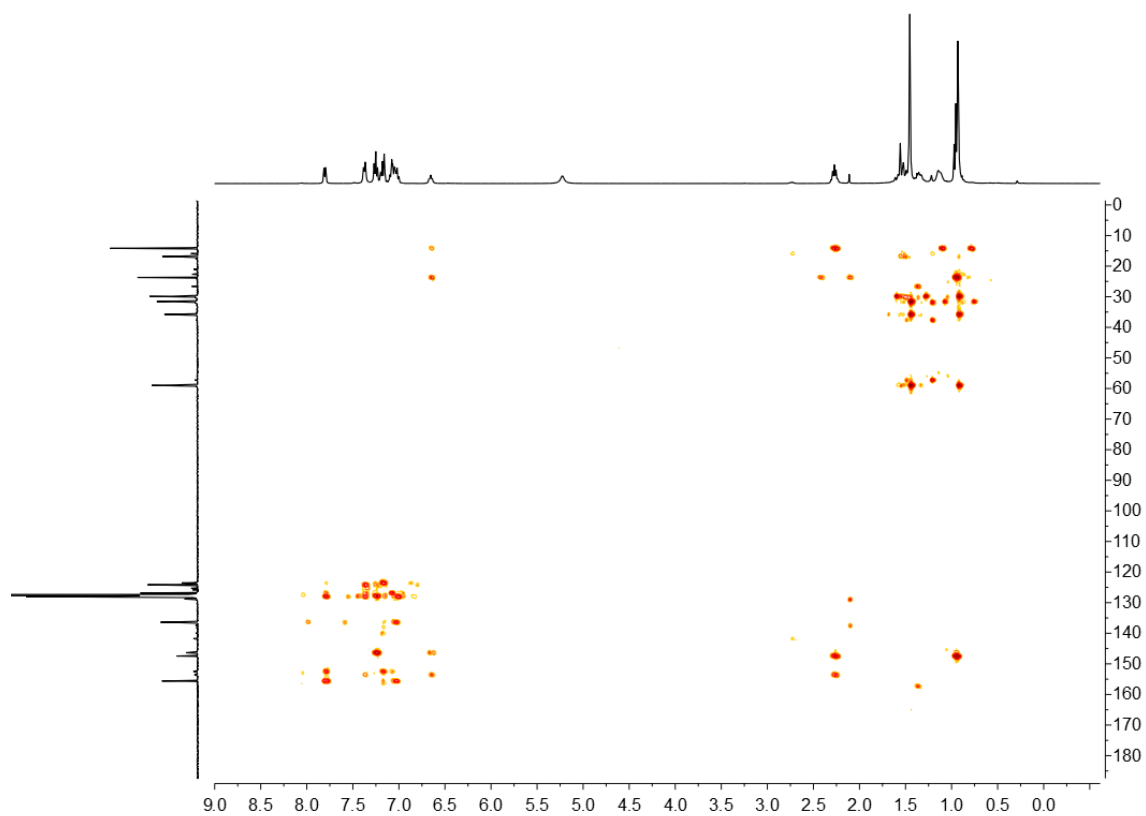

**Figure S5-4.**  $^1\text{H}$ ,  $^{13}\text{C}$ -HMBC spectrum of **6** in  $\text{C}_6\text{D}_6$  at 298 K

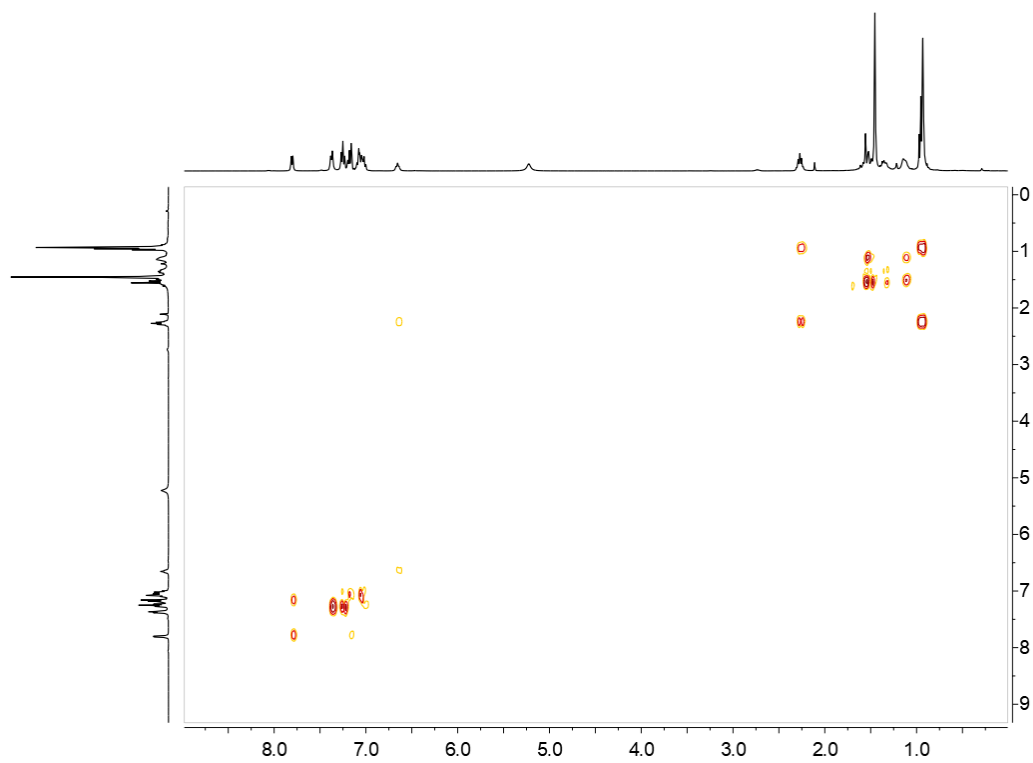

**Figure S5-5.**  $^1\text{H}$ ,  $^1\text{H}$ -COSY spectrum of **6** in  $\text{C}_6\text{D}_6$  at 298 K

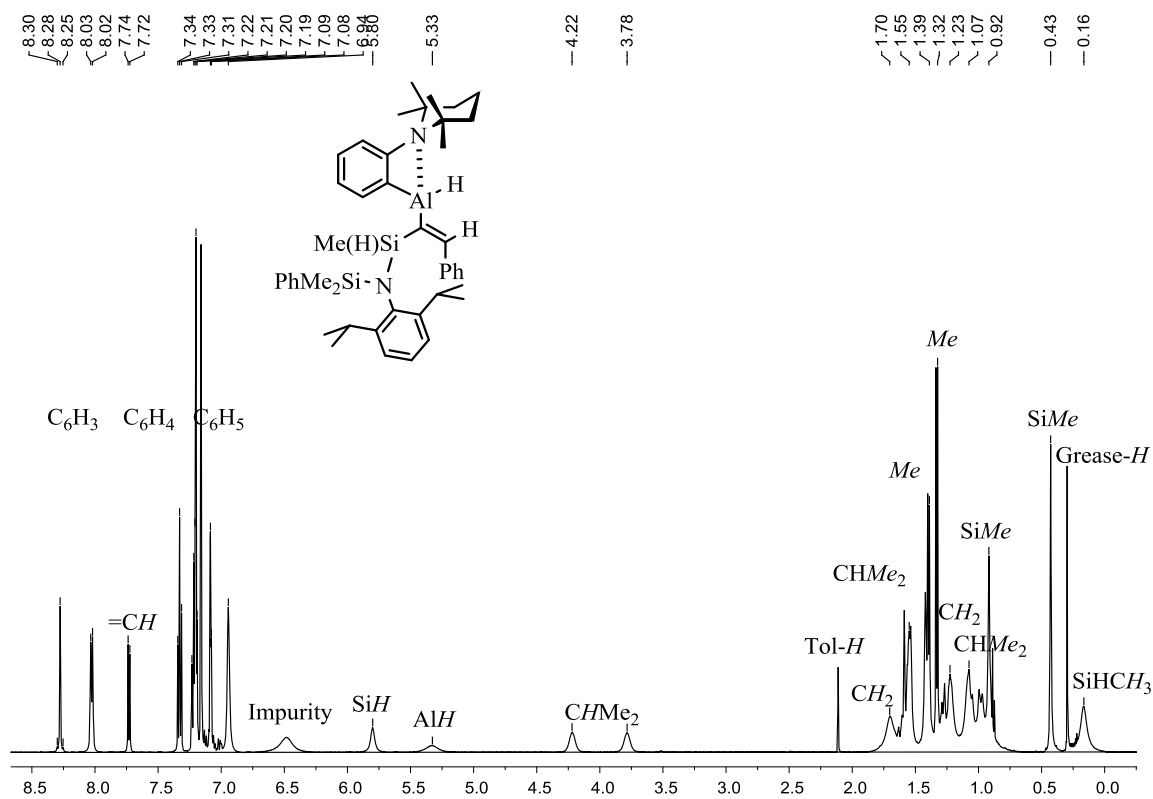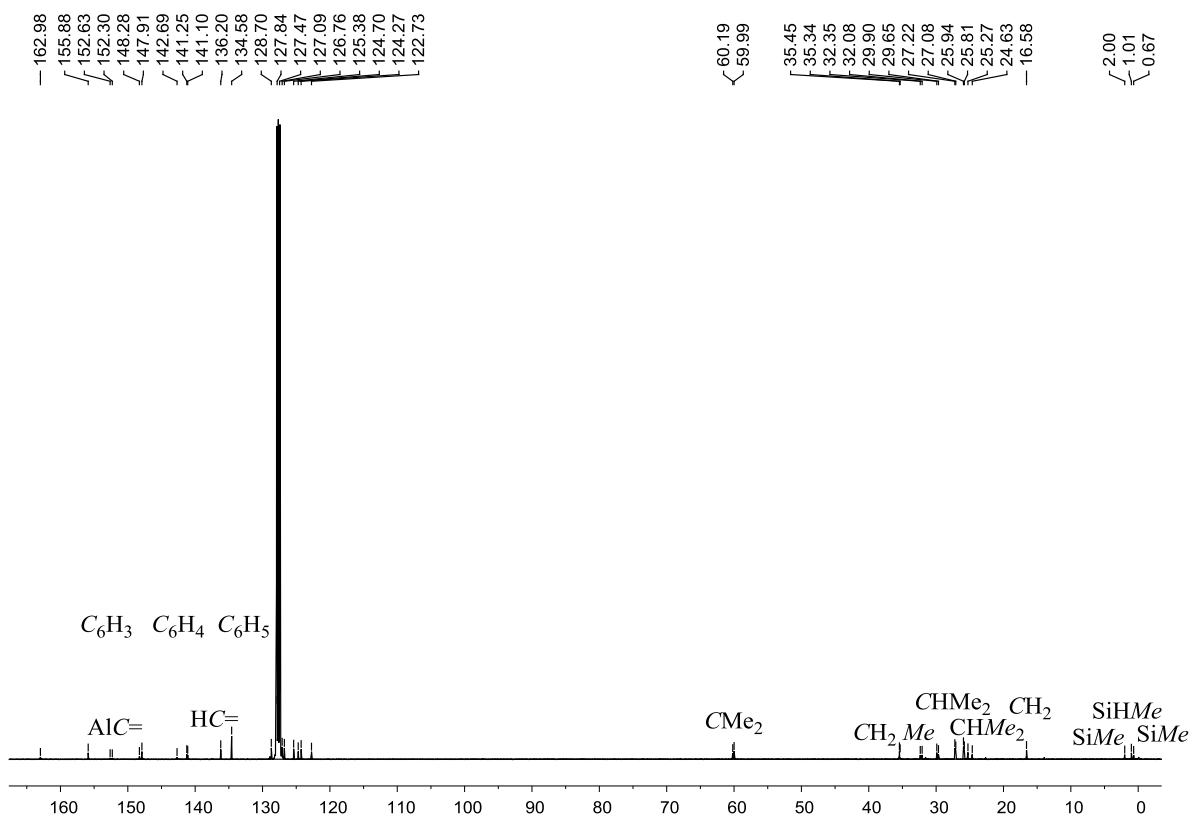

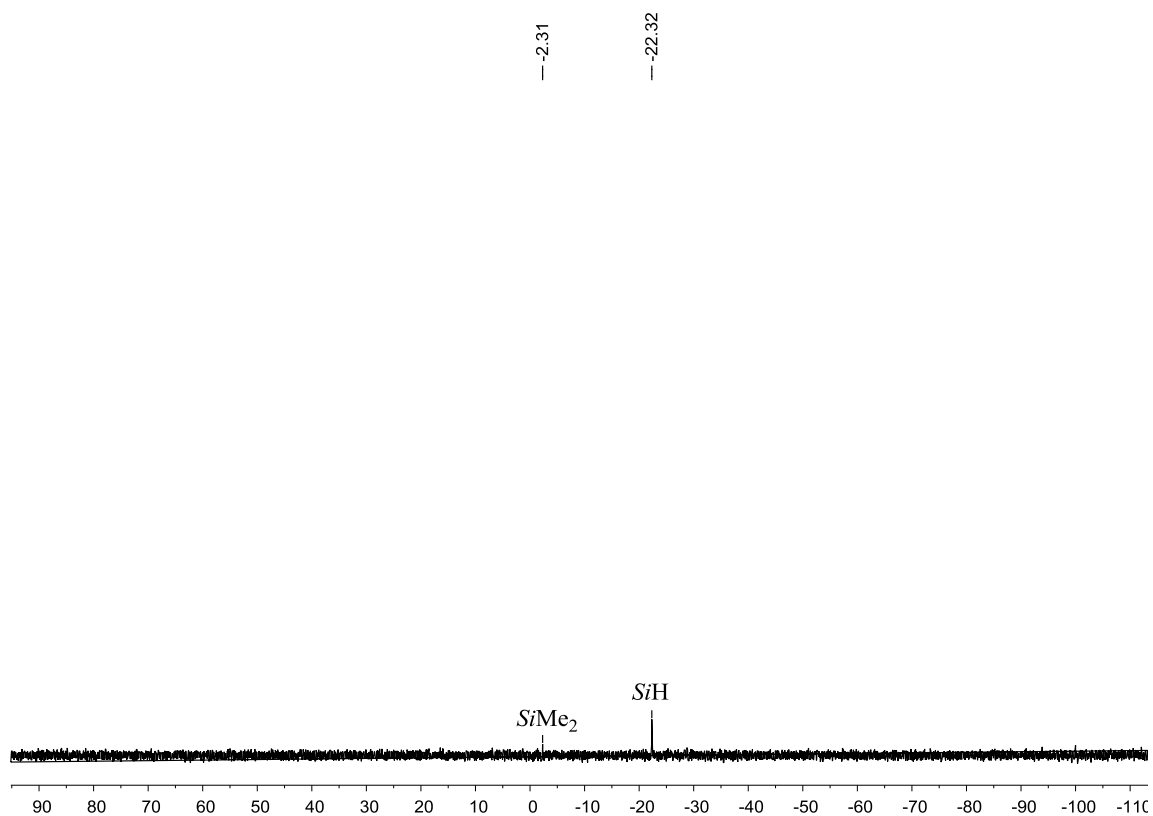

**Figure S6-3.**  $^{29}\text{Si}$  NMR spectrum of **7** in  $\text{C}_6\text{D}_6$  at 298 K

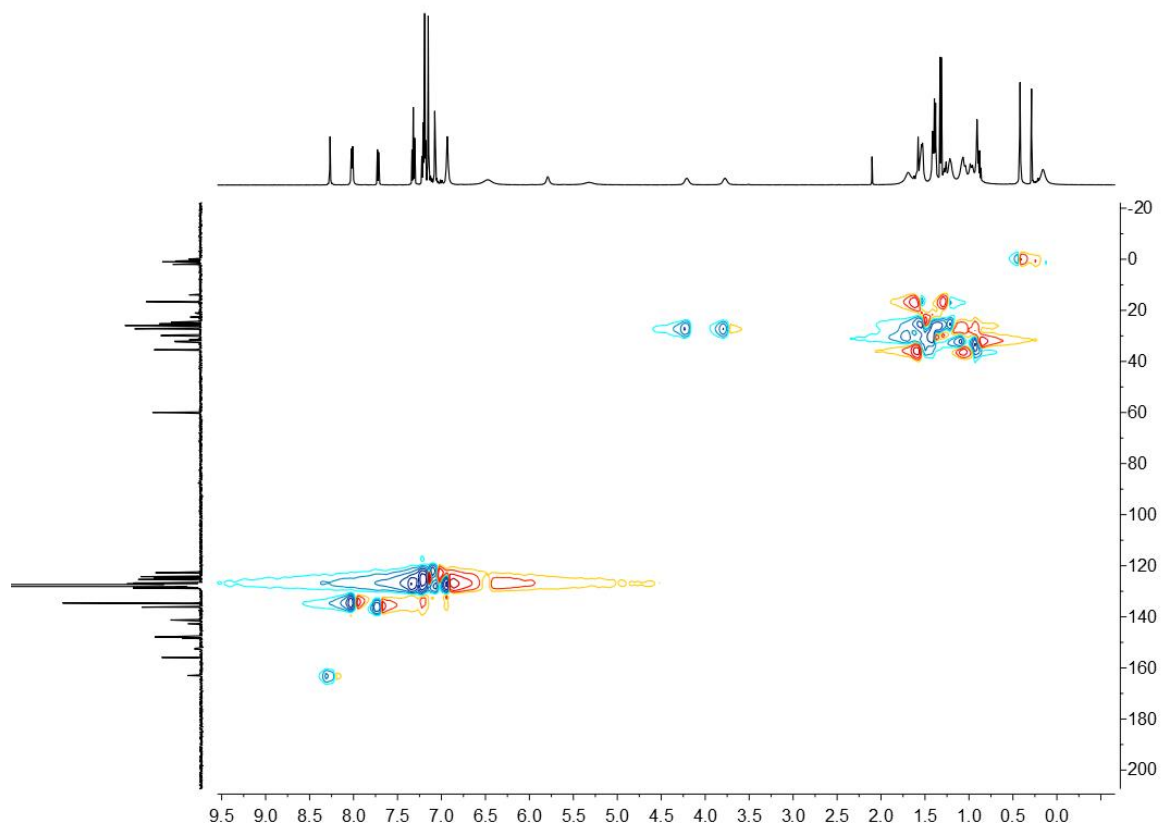

**Figure S6-4.**  $^1\text{H}$ ,  $^{13}\text{C}$ -HSQC spectrum of **7** in  $\text{C}_6\text{D}_6$  at 298 K

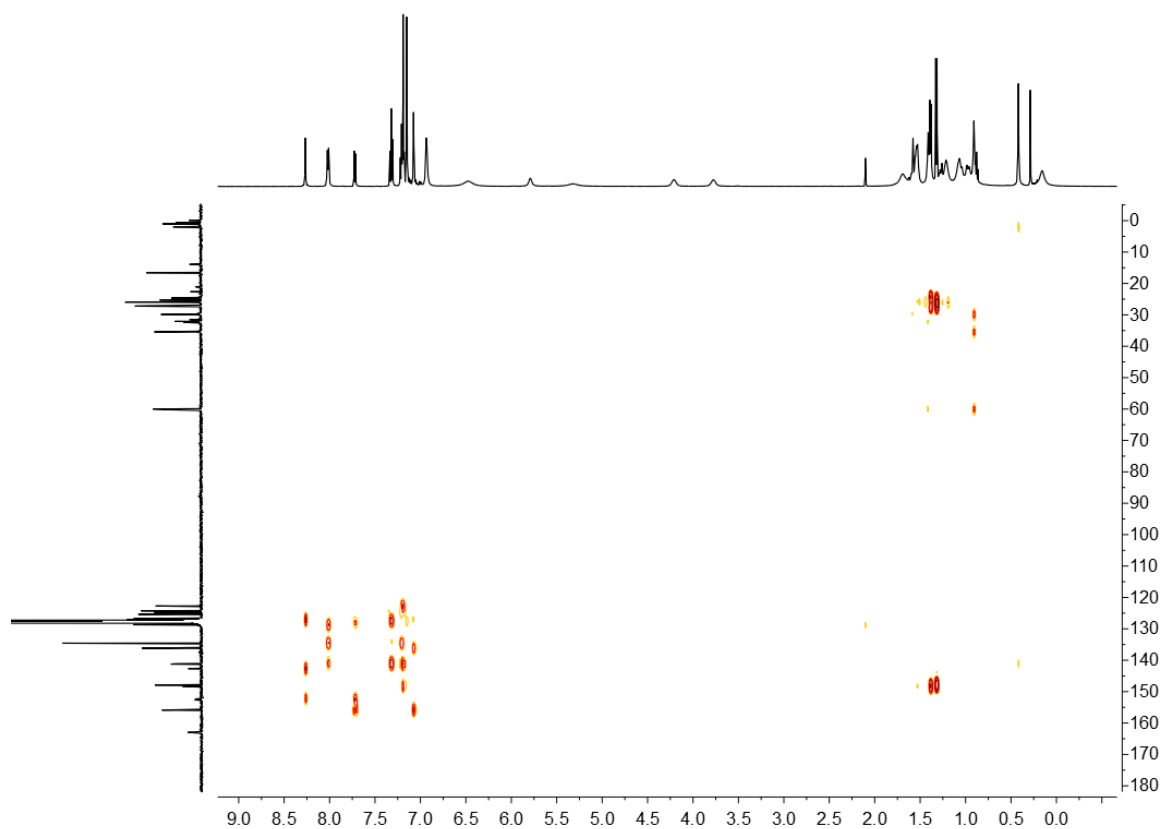

**Figure S6-5.**  $^1\text{H}$ ,  $^{13}\text{C}$ -HMBC spectrum of **7** in  $\text{C}_6\text{D}_6$  at 298 K

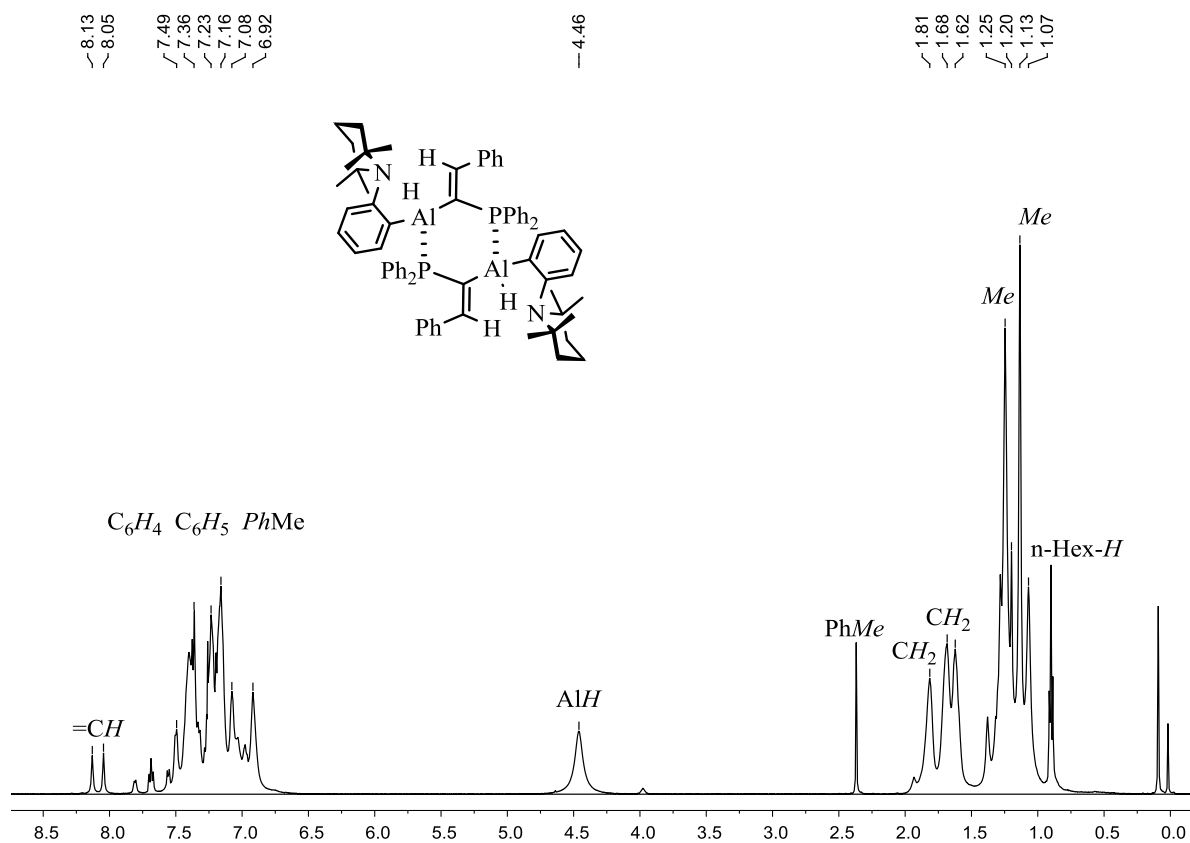

**Figure S7-1.**  $^1\text{H}$  NMR spectrum of **8** in  $\text{CDCl}_3$  at 298 K

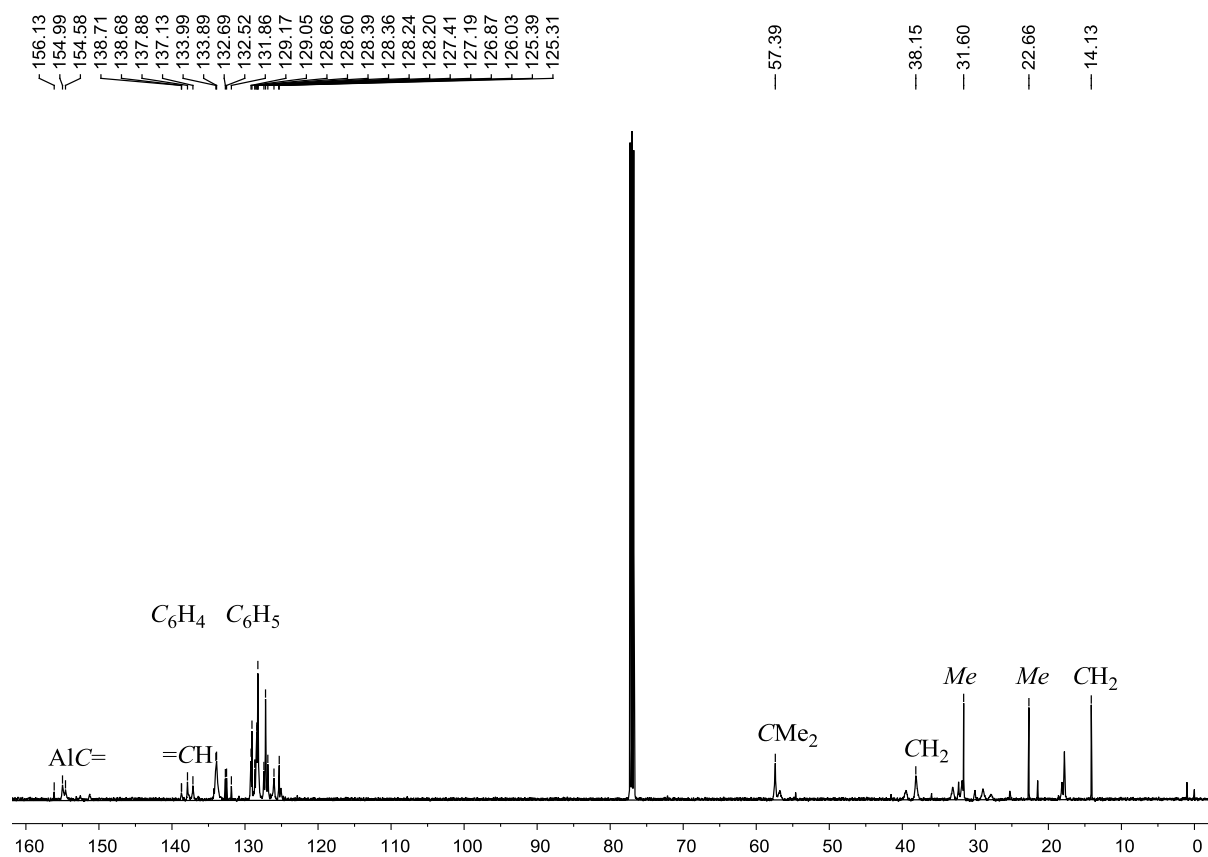

**Figure S7-2.** <sup>13</sup>C NMR spectrum of **8** in CDCl<sub>3</sub> at 298 K

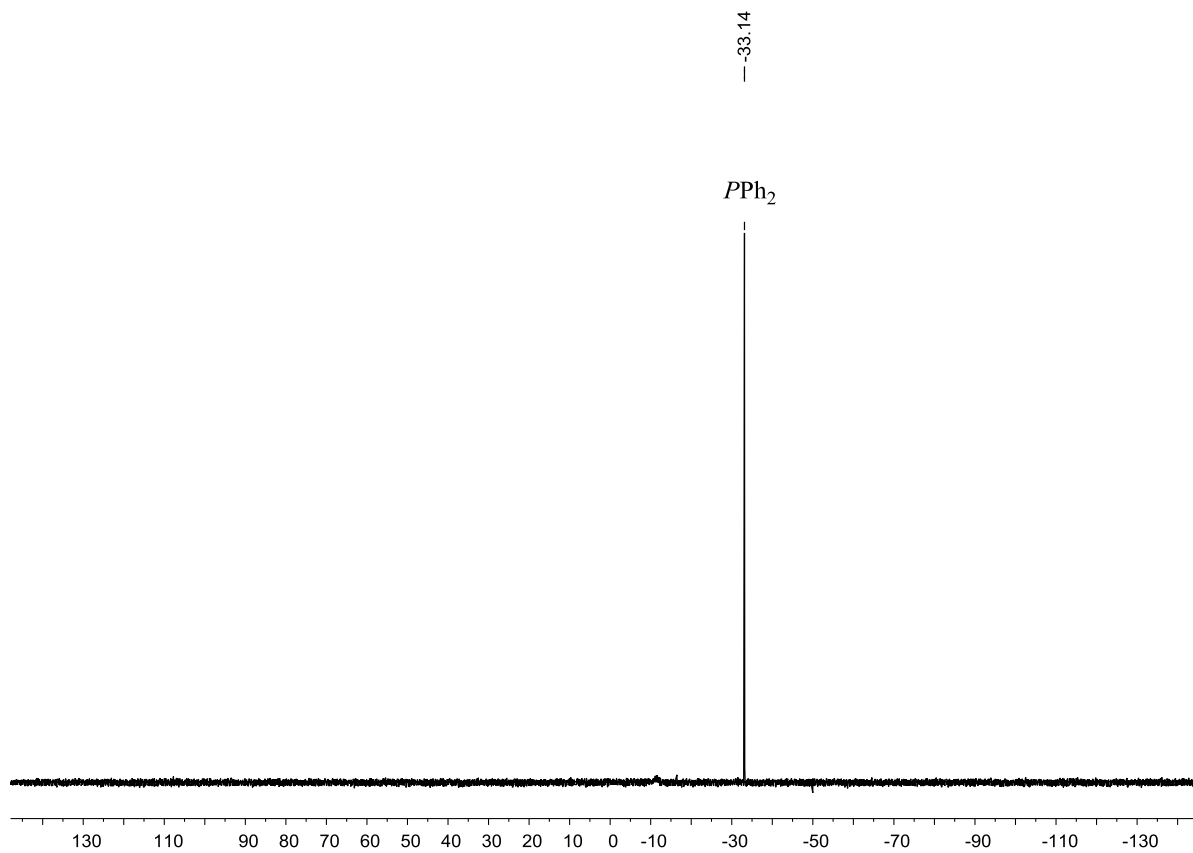

**Figure S7-3.** <sup>31</sup>P NMR spectrum of **8** in CDCl<sub>3</sub> at 298 K

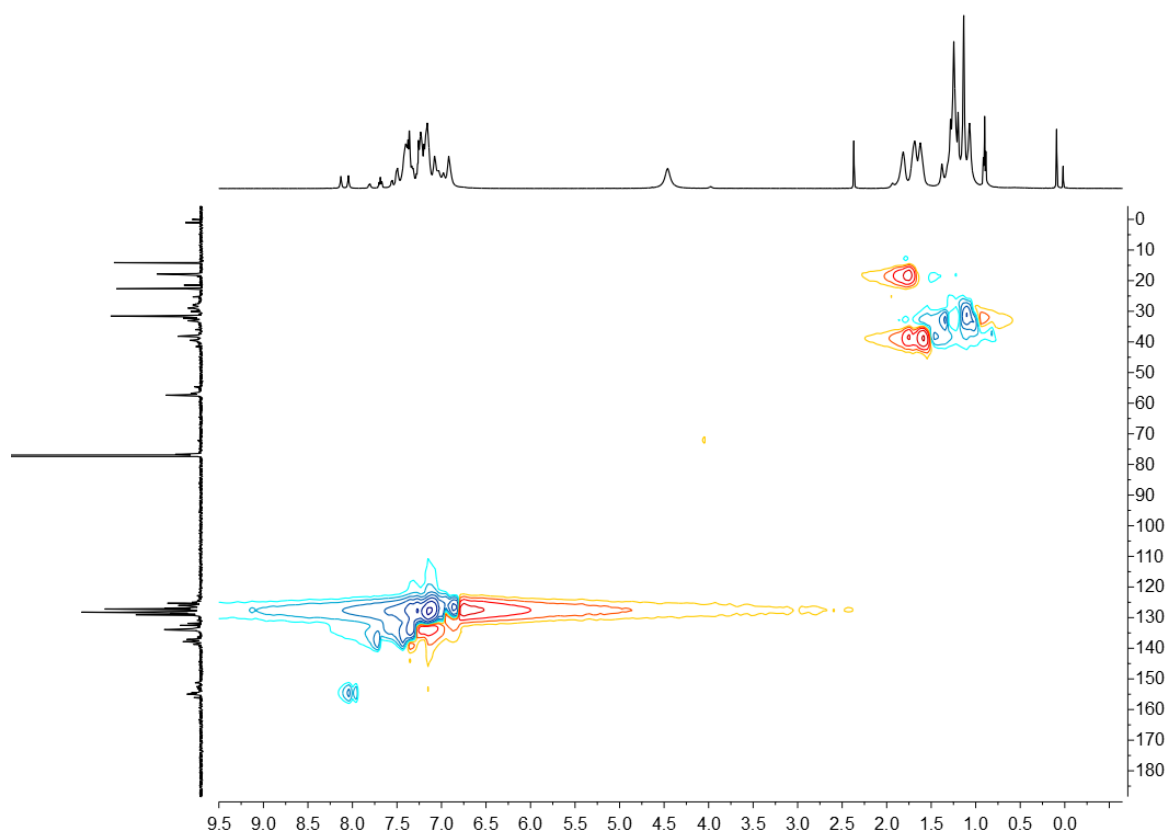

**Figure S7-4.**  $^1\text{H}$ ,  $^{13}\text{C}$ -HSQC spectrum of **8** in  $\text{CDCl}_3$  at 298 K

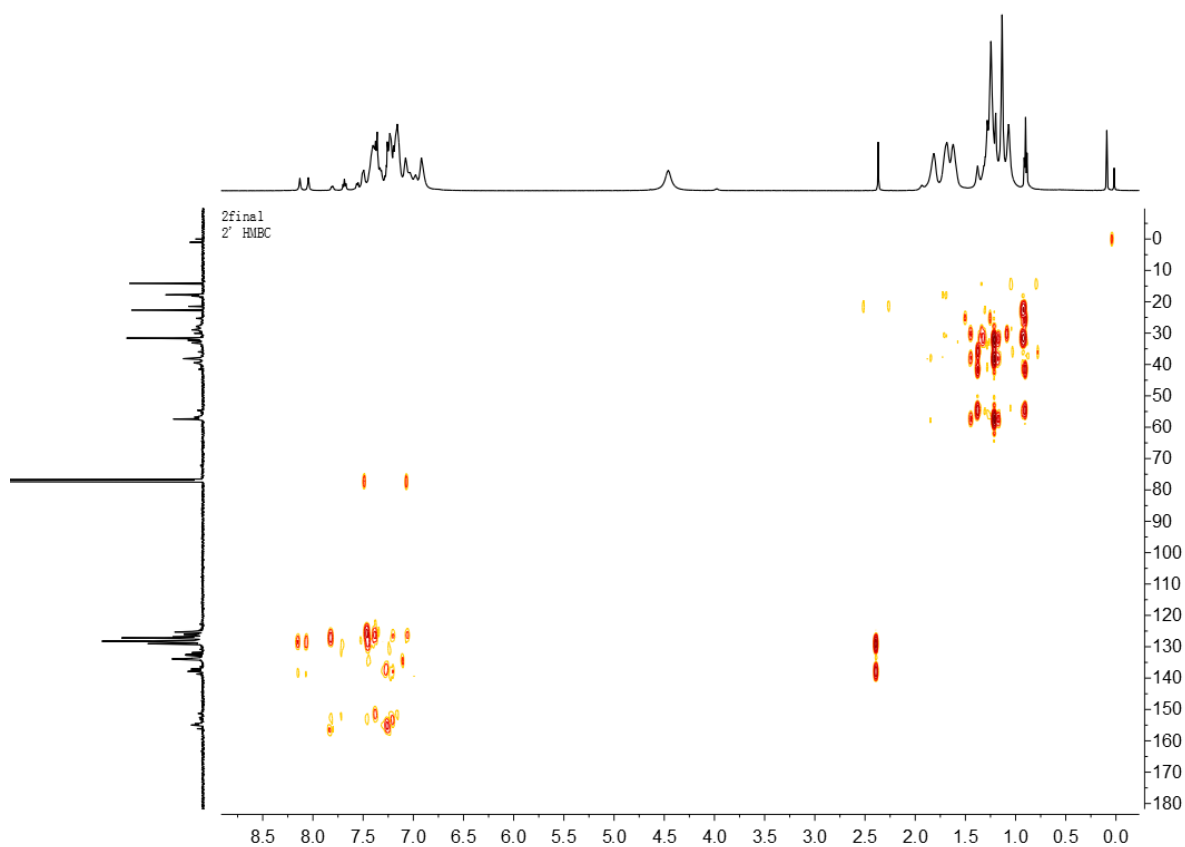

**Figure S7-5.**  $^1\text{H}$ ,  $^{13}\text{C}$ -HMBC spectrum of **8** in  $\text{CDCl}_3$  at 298 K

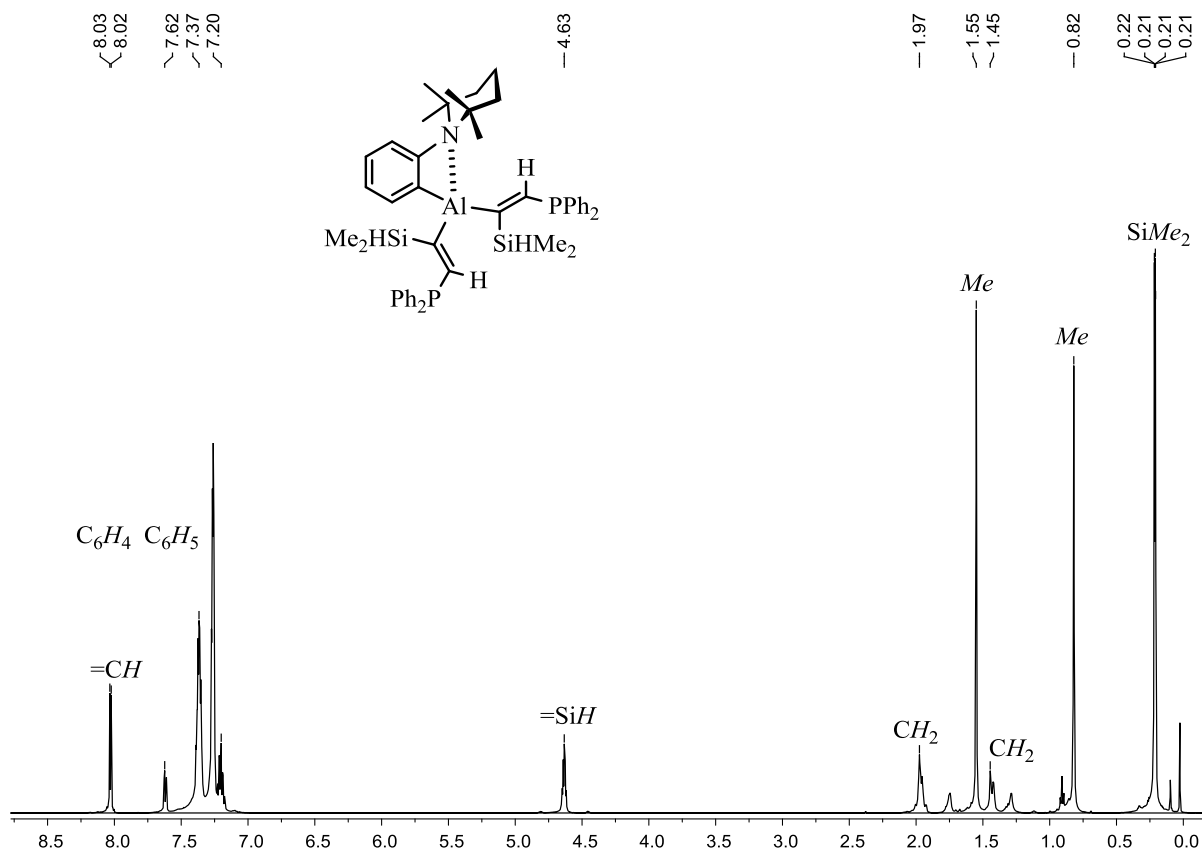

**Figure S8-1.** <sup>1</sup>H NMR spectrum of **9** in CDCl<sub>3</sub> at 298 K

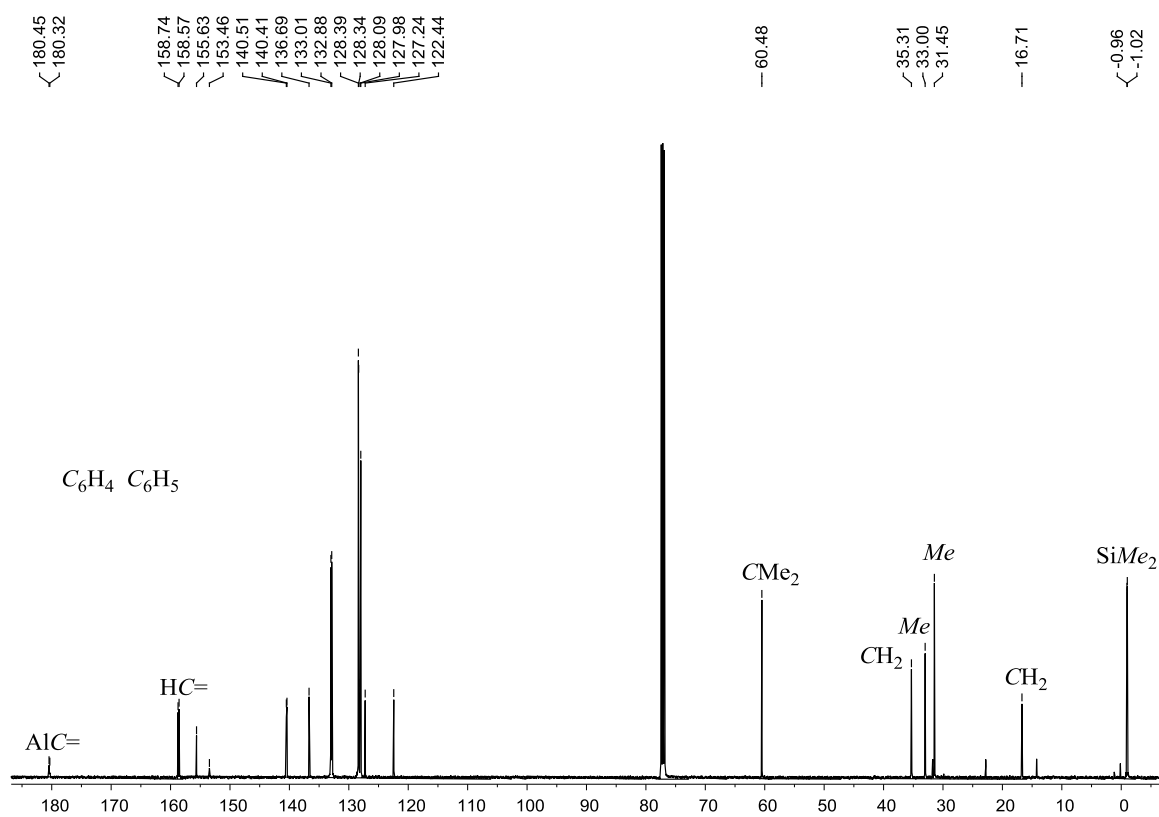

**Figure S8-2.** <sup>13</sup>C NMR spectrum of **9** in CDCl<sub>3</sub> at 298 K

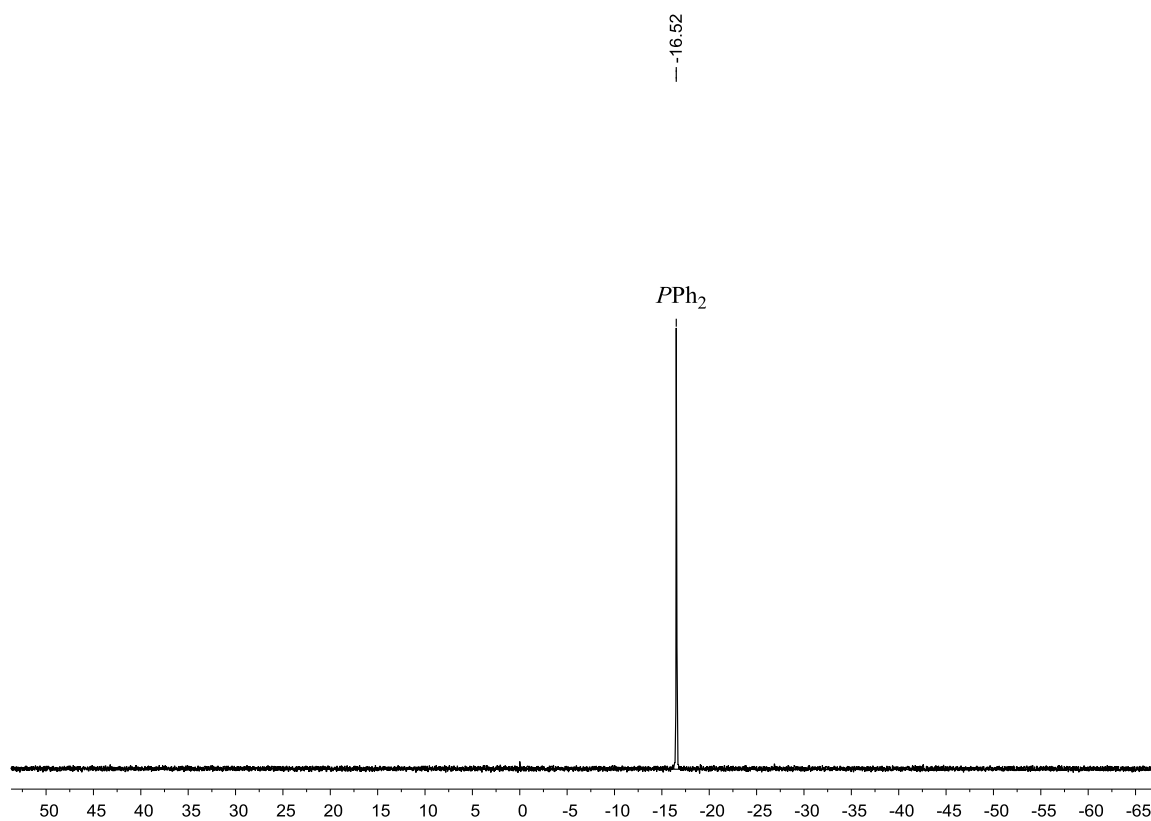

**Figure S8-3.**  $^{31}\text{P}$  NMR spectrum of **9** in  $\text{CDCl}_3$  at 298 K

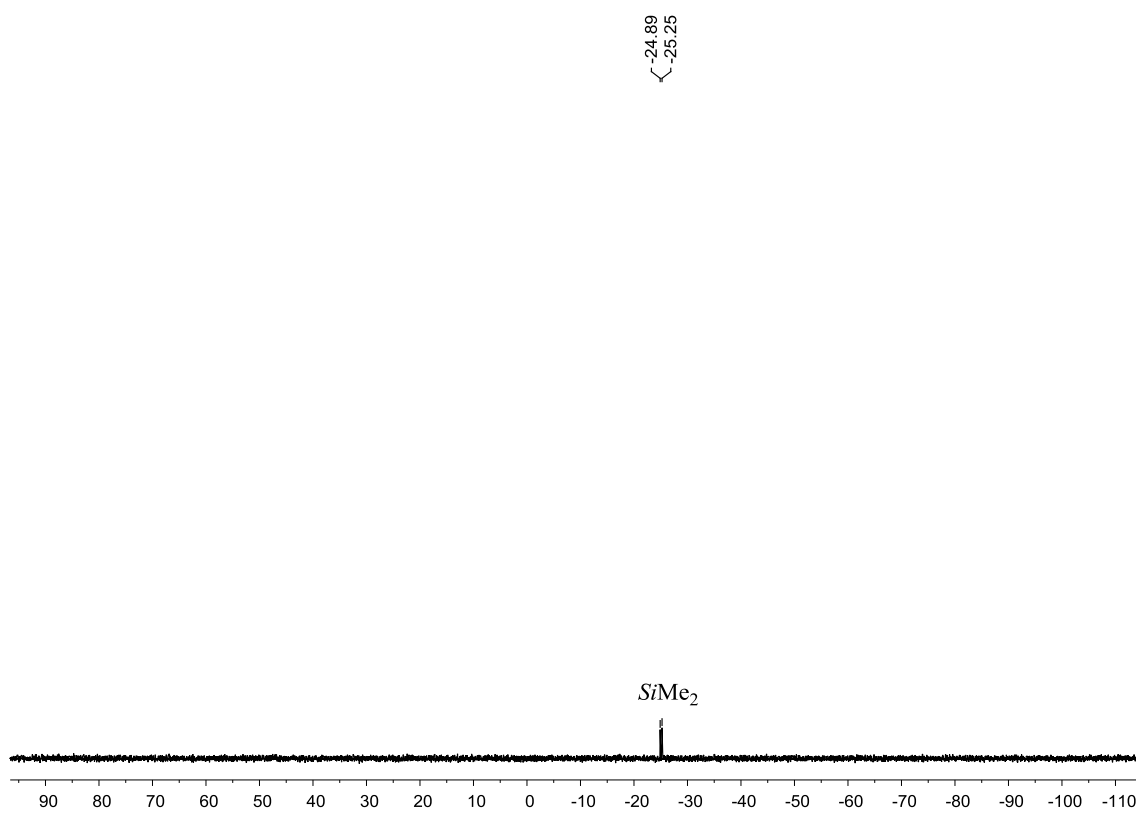

**Figure S8-4.**  $^{29}\text{Si}$  NMR spectrum of **9** in  $\text{C}_6\text{D}_6$  at 298 K

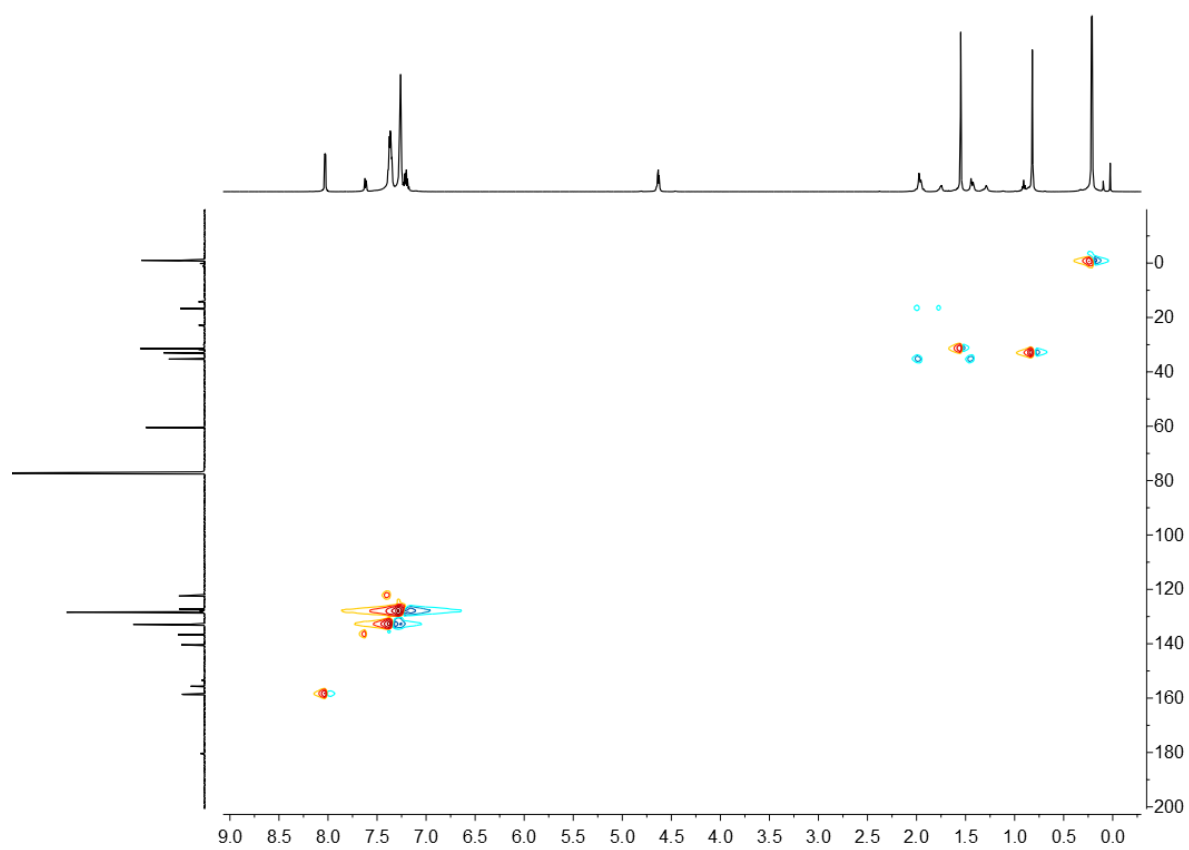

**Figure S8-5.**  $^1\text{H}$ ,  $^{13}\text{C}$ -HSQC spectrum of **9** in  $\text{CDCl}_3$  at 298 K

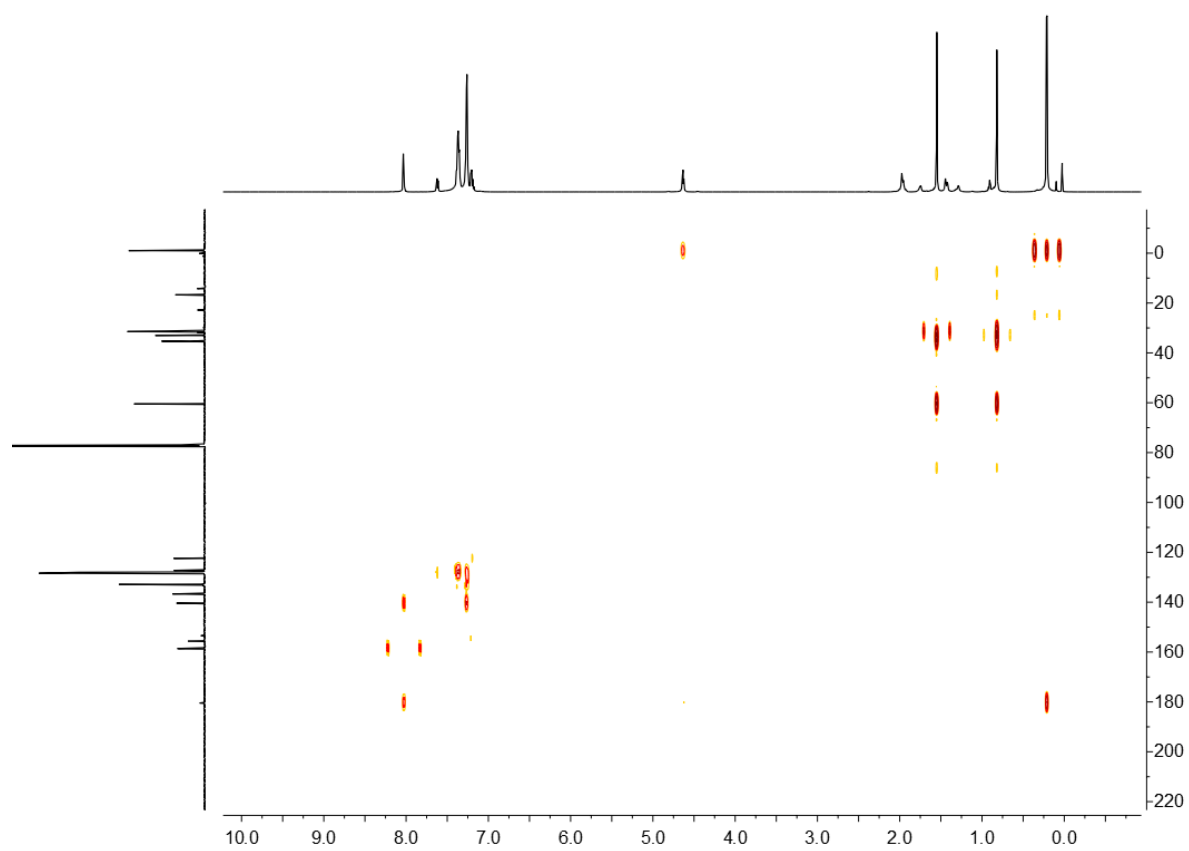

**Figure S8-6.**  $^1\text{H}$ ,  $^{13}\text{C}$ -HMBC spectrum of **9** in  $\text{CDCl}_3$  at 298 K

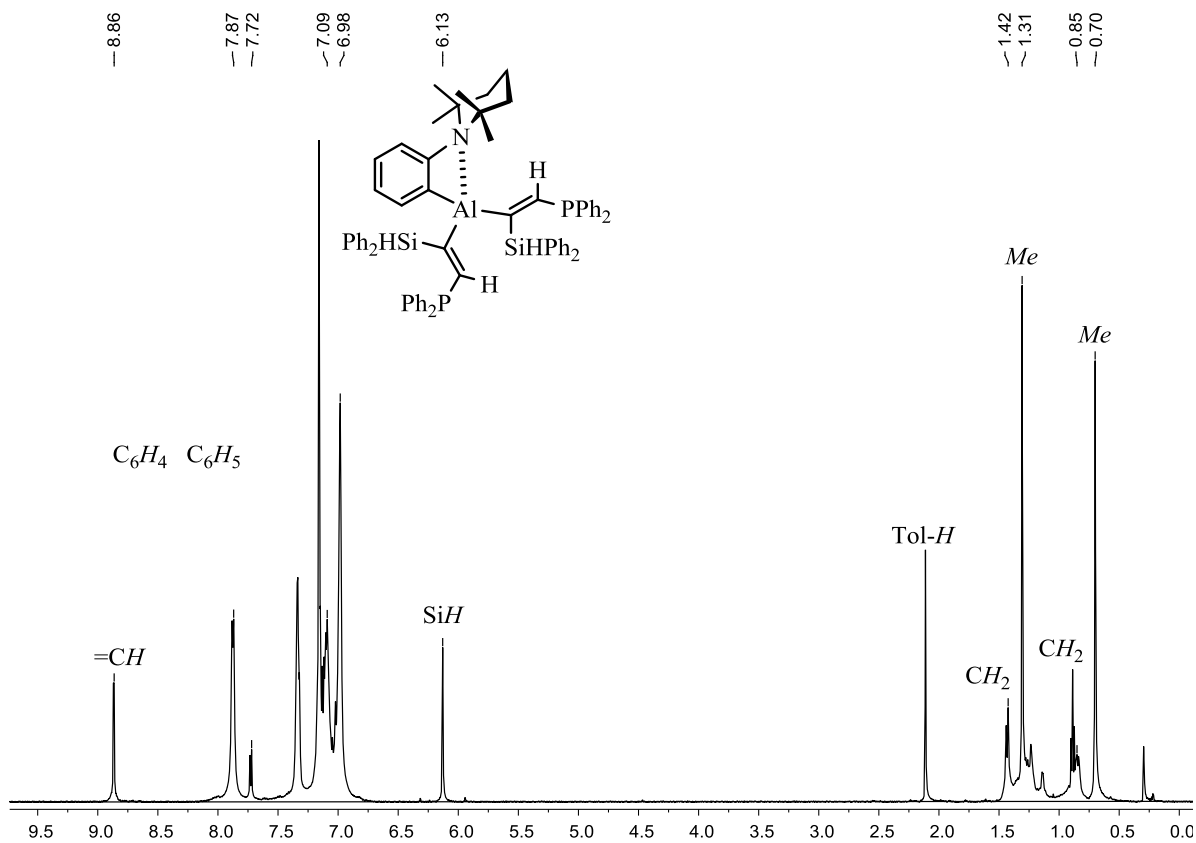

Figure S9-1.  $^1\text{H}$  NMR spectrum of **10** in  $\text{C}_6\text{D}_6$  at 298 K

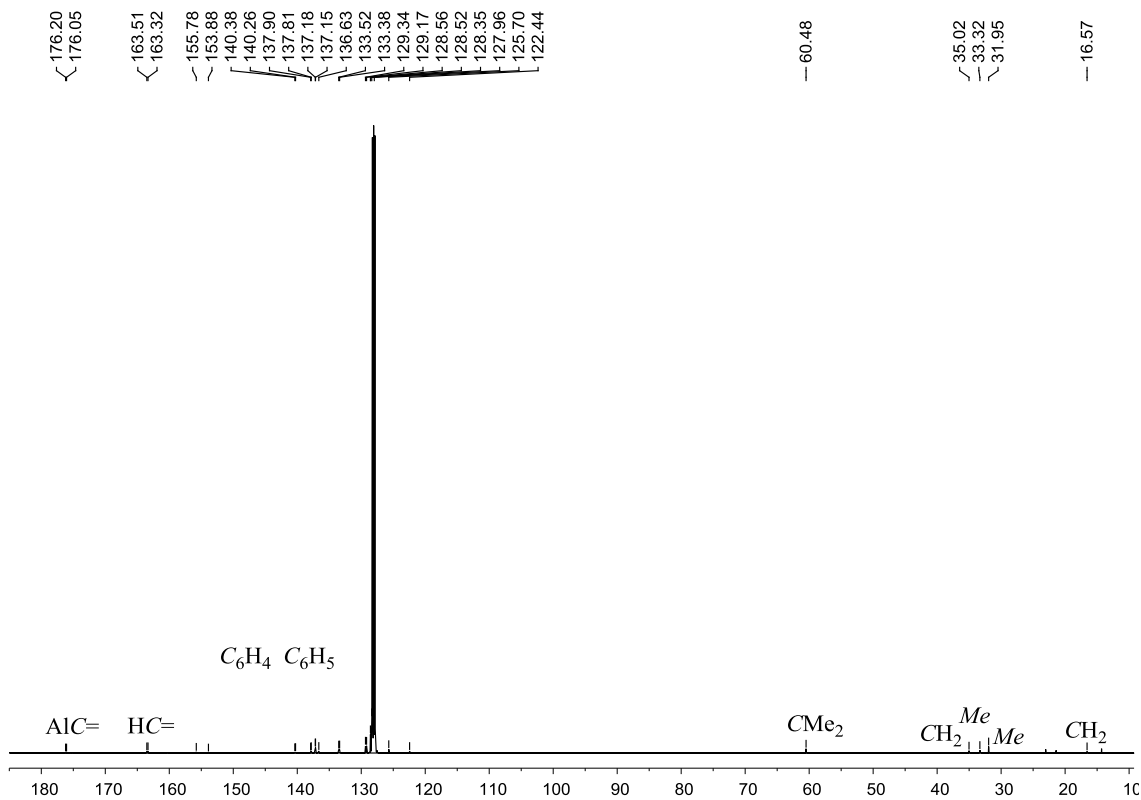

Figure S9-2.  $^{13}\text{C}$  NMR spectrum of **10** in  $\text{C}_6\text{D}_6$  at 298 K

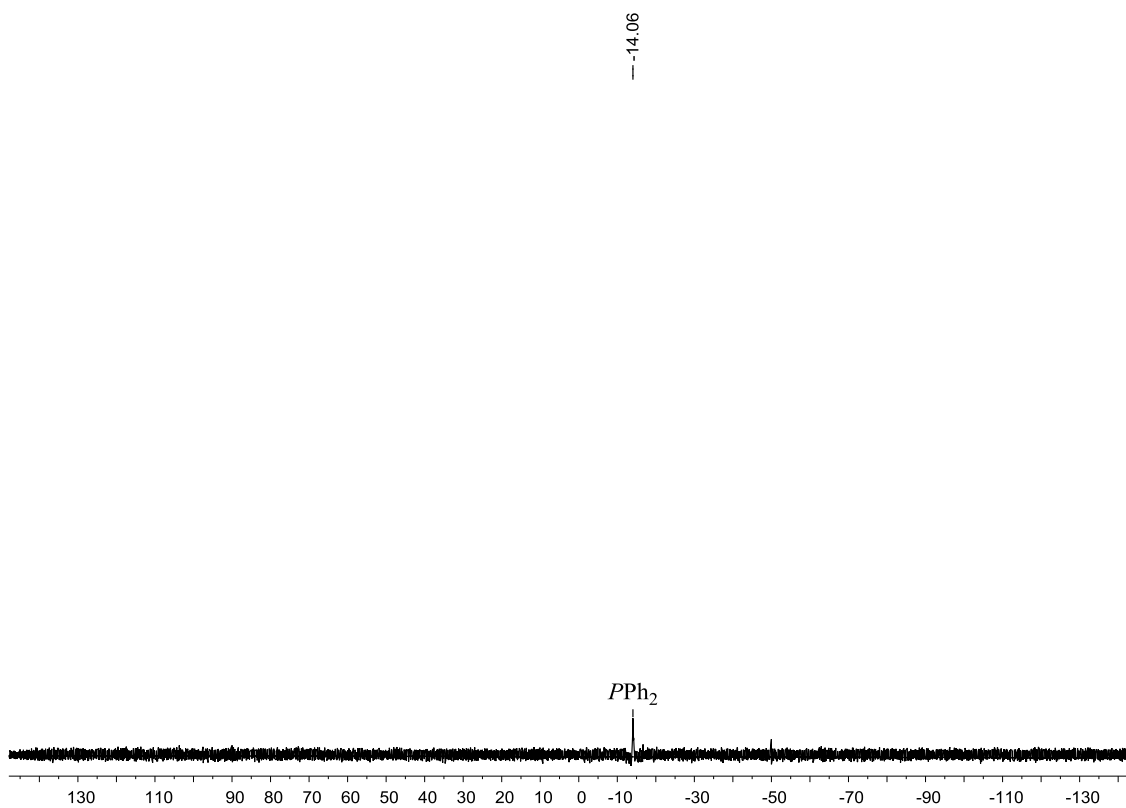

**Figure S9-3.** <sup>31</sup>P NMR spectrum of **10** in C<sub>6</sub>D<sub>6</sub> at 298 K

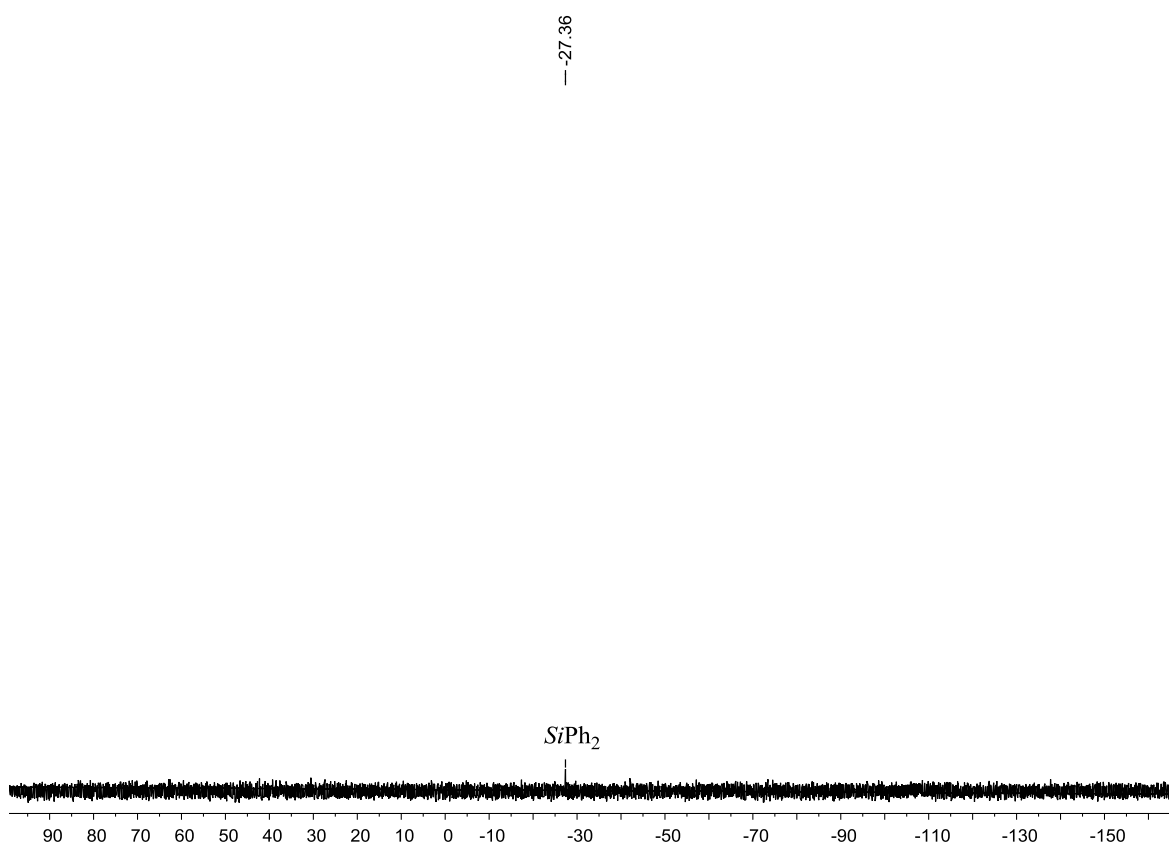

**Figure S9-4.** <sup>29</sup>Si NMR spectrum of **10** in C<sub>6</sub>D<sub>6</sub> at 298 K

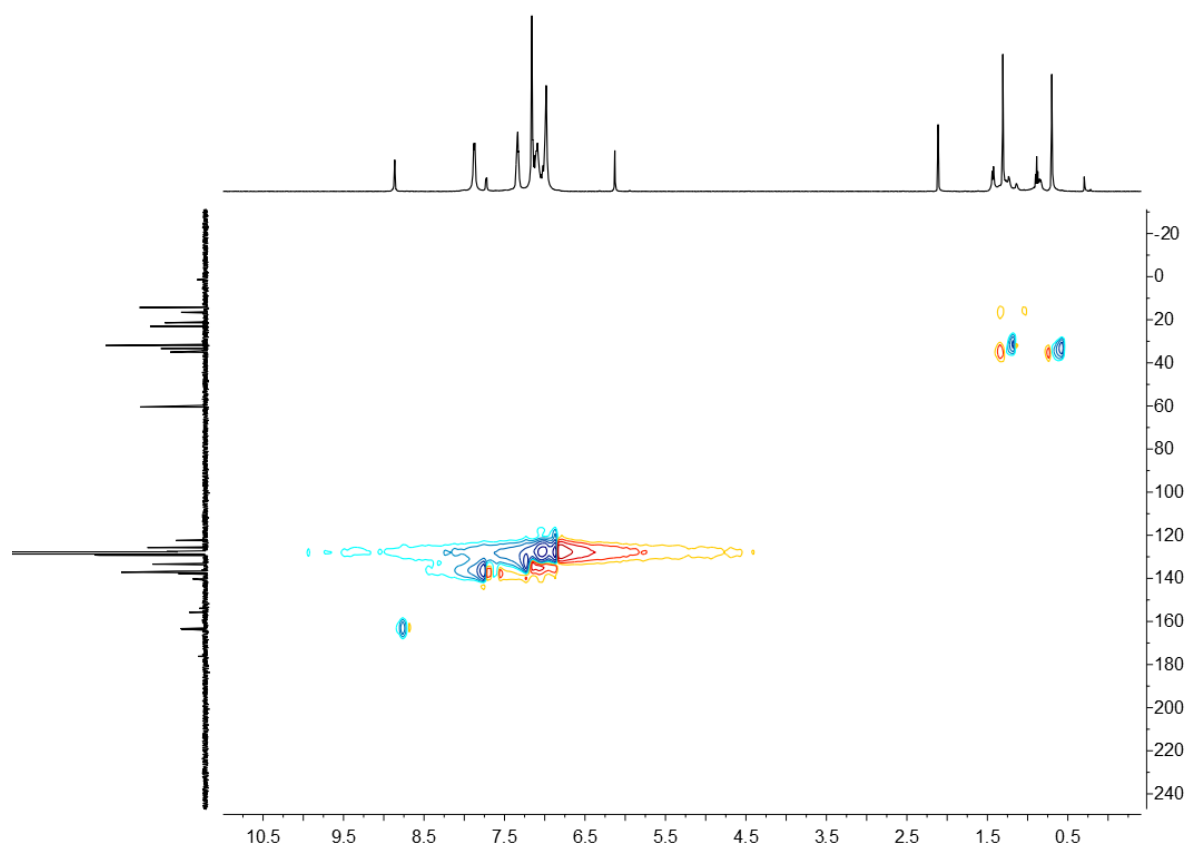

**Figure S9-5.**  $^1\text{H}$ ,  $^{13}\text{C}$ -HSQC spectrum of **10** in  $\text{C}_6\text{D}_6$  at 298 K

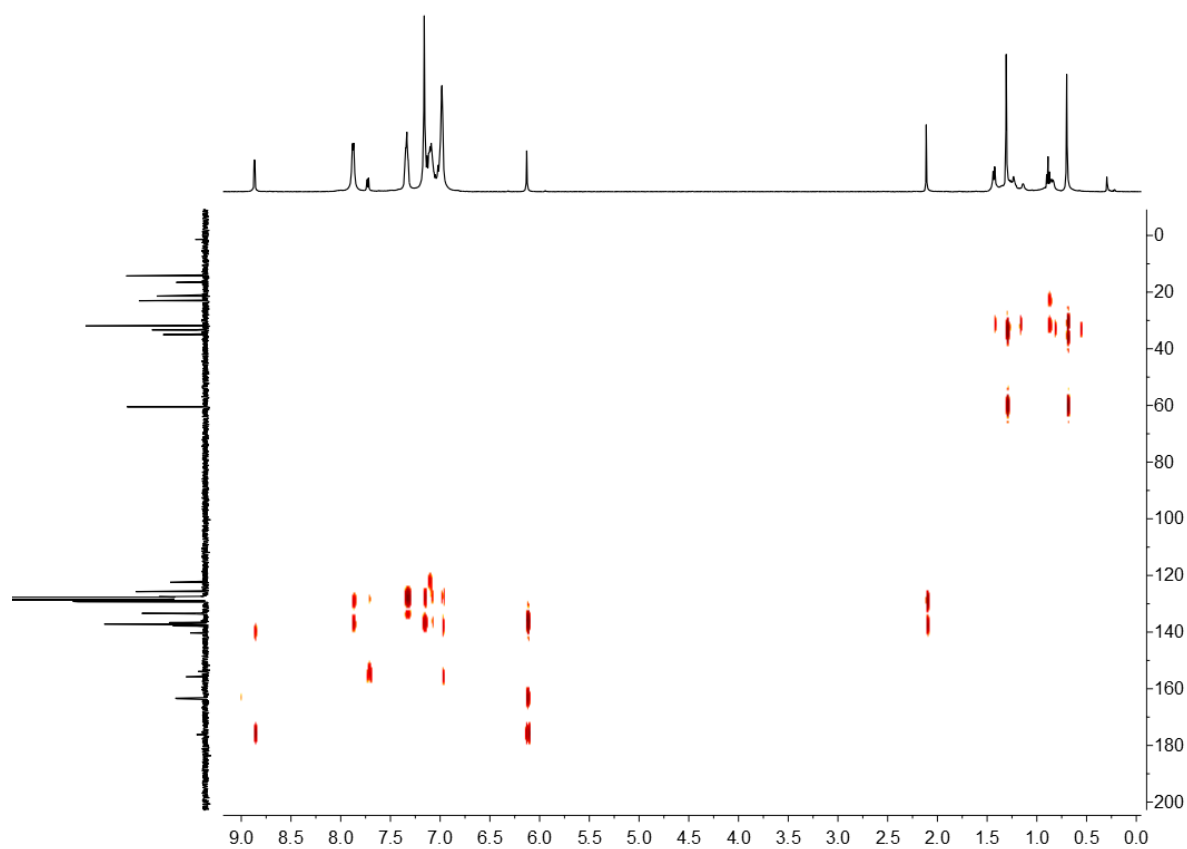

**Figure S9-6.**  $^1\text{H}$ ,  $^{13}\text{C}$ -HMBC spectrum of **10** in  $\text{C}_6\text{D}_6$  at 298 K

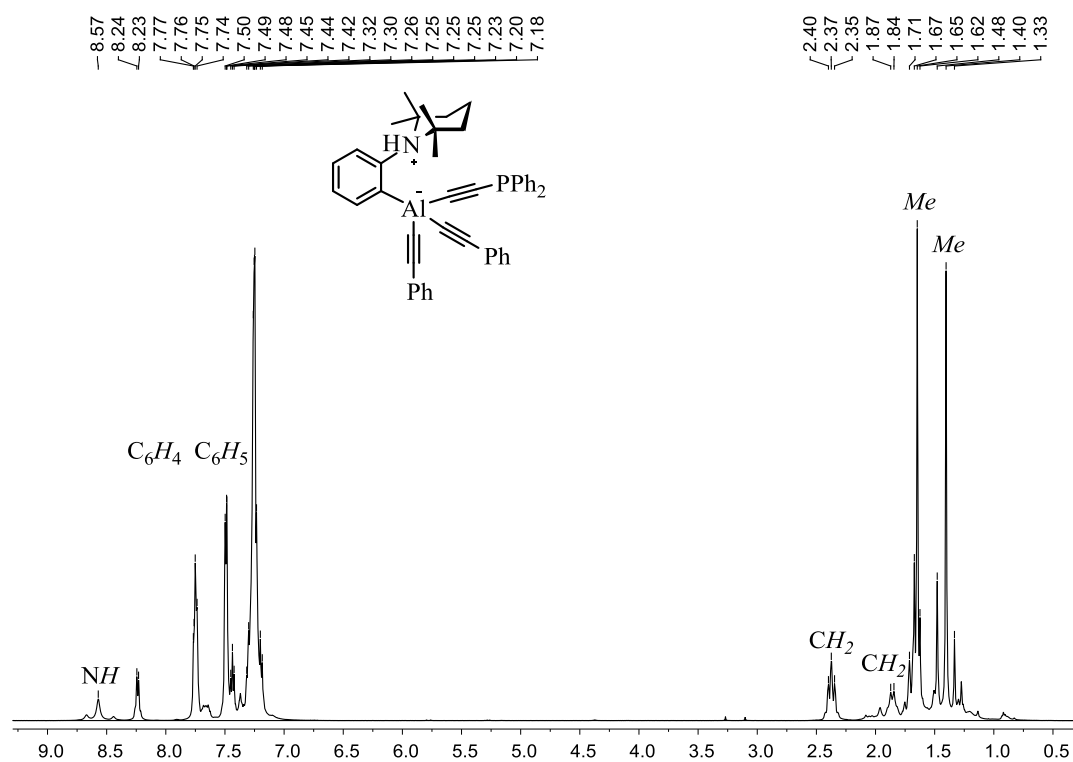

**Figure S10-1.**  $^1\text{H}$  NMR spectrum recorded reaction of **2** and one equiv of  $\text{HC}\equiv\text{CPh}_2$  to compound  $[o-(\text{TMP})\text{H}-\text{C}_6\text{H}_4]\text{Al}(\text{C}\equiv\text{CPh})_2(\text{C}\equiv\text{CPh}_2)$  in  $\text{C}_6\text{D}_6$  at 298 K

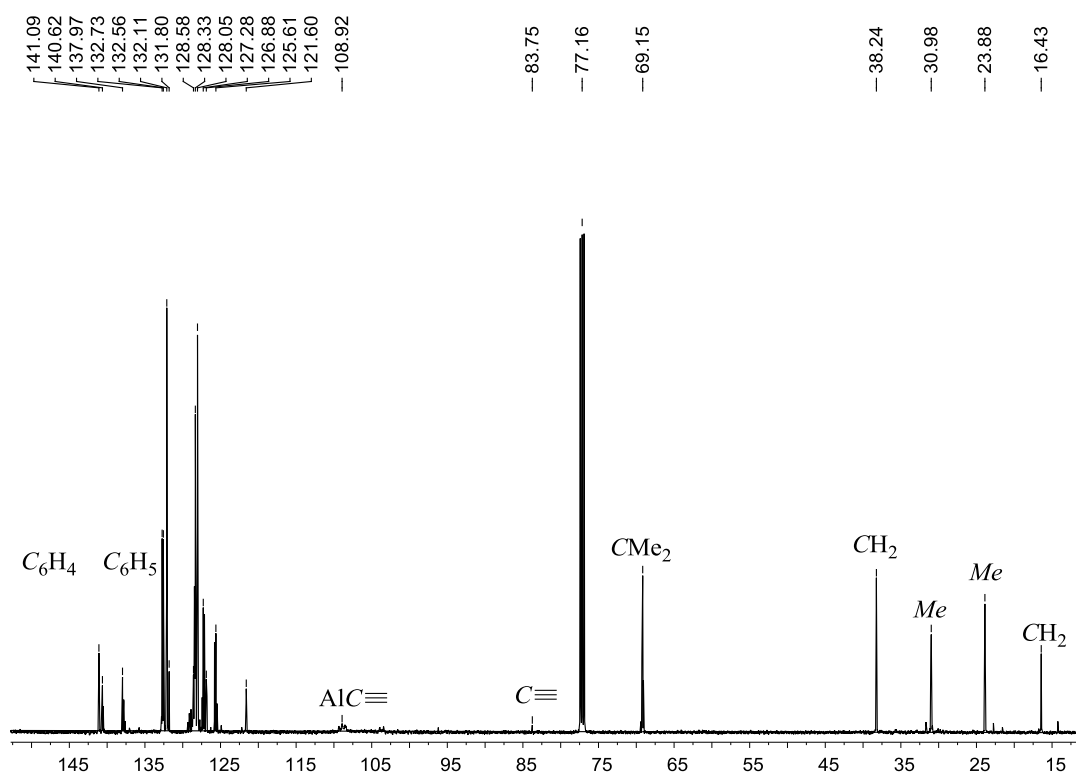

**Figure S10-2.**  $^{13}\text{C}$  NMR spectrum recorded reaction of **2** and one equiv of  $\text{HC}\equiv\text{CPh}_2$  to compound  $[o-(\text{TMP})\text{H}-\text{C}_6\text{H}_4]\text{Al}(\text{C}\equiv\text{CPh})_2(\text{C}\equiv\text{CPh}_2)$  in  $\text{C}_6\text{D}_6$  at 298 K

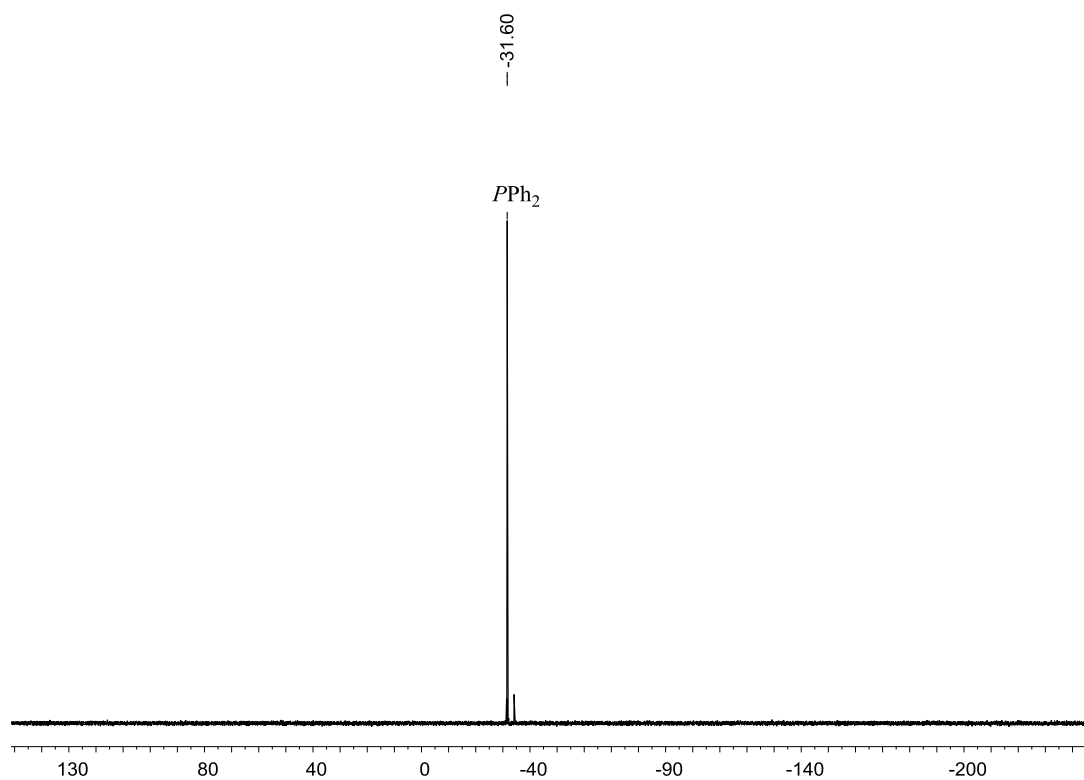

**Figure S10-3.**  $^{31}\text{P}$  NMR spectrum recorded reaction of **2** and one equiv of  $\text{HC}\equiv\text{CPh}_2$  to compound  $[\text{o}-(\text{TMP})\text{H}-\text{C}_6\text{H}_4]\text{Al}(\text{C}\equiv\text{CPh})_2(\text{C}\equiv\text{CPh}_2)$  in  $\text{C}_6\text{D}_6$  at 298 K

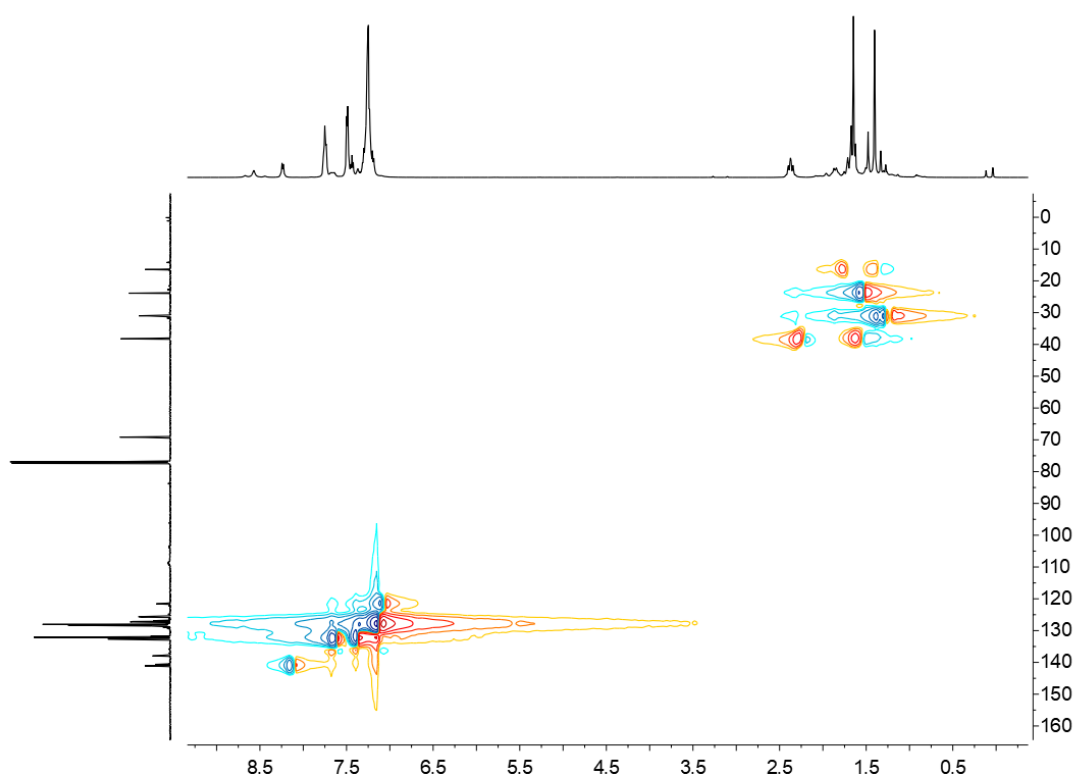

**Figure S10-4.**  $^1\text{H}$ ,  $^{13}\text{C}$ -HSQC spectrum recorded reaction of **2** and one equiv of  $\text{HC}\equiv\text{CPh}_2$  to compound  $[\text{o}-(\text{TMP})\text{H}-\text{C}_6\text{H}_4]\text{Al}(\text{C}\equiv\text{CPh})_2(\text{C}\equiv\text{CPh}_2)$  in  $\text{C}_6\text{D}_6$  at 298 K

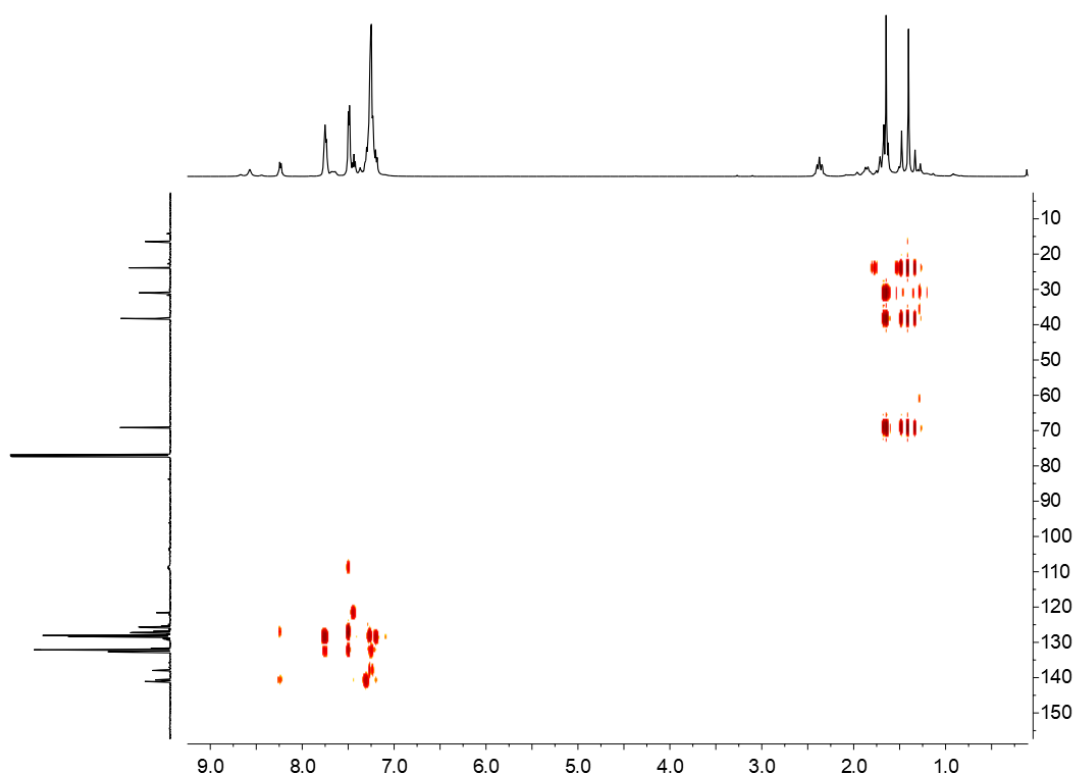

**Figure S10-5.**  $^1\text{H}$ ,  $^{13}\text{C}$ -HMBC spectrum recorded reaction of **2** and one equiv of  $\text{HC}\equiv\text{CPh}_2$  to compound  $[o\text{-(TMP)H-C}_6\text{H}_4]\text{Al}(\text{C}\equiv\text{CPh})_2(\text{C}\equiv\text{CPh}_2)$  in  $\text{C}_6\text{D}_6$  at 298 K
